# Supplementary material
Source: PubMed Central journal article supplement (PMC4881240)
Supplement: mmc1.pdf [file mmc1.pdf]

**Biophysical Journal, Volume 110**

**Supplemental Information**

**Relative Orientation of POTRA Domains from Cyanobacterial Omp85  
Studied by Pulsed EPR Spectroscopy**

**Reza Dastvan, Eva-Maria Brouwer, Denise Schuetz, Oliver Mirus, Enrico Schleiff, and Thomas F. Prisner**

## Relative orientation of POTRA domains from cyanobacterial Omp85 studied by pulsed EPR spectroscopy

Reza Dastvan<sup>1,2,‡,#</sup>, Eva-Maria Brouwer<sup>3,‡</sup>, Denise Schuetz<sup>1,2</sup>, Oliver Mirus<sup>3</sup>, Enrico Schleiff<sup>2-4,\*</sup> and Thomas F. Prisner,<sup>1,2,\*</sup>

1 Institute of Physical and Theoretical Chemistry and Center for Biomolecular Magnetic Resonance, 2 Cluster of Excellence Macromolecular Complexes, 3 Molecular Cell Biology of Plants, 4 Buchmann Institute for Molecular Life Sciences, Goethe University Frankfurt, Frankfurt am Main, Germany

### Supporting Figures

Supporting Figure 1. EPR on singly-labeled POTRA domains.

Supporting Figure 2. Impact of cryoprotectants and freezing conditions on PELDOR results.

Supporting Figure 3. Intra-POTRA domain distance constraints of individual POTRA domains.

Supporting Figure 4. Comparison of background-corrected PELDOR time traces of intra-POTRA domain distances of individual POTRA domains with simulated intramolecular dipolar evolution functions.

Supporting Figure 5. Comparison of intra-POTRA domain distance distributions generated by various methods.

Supporting Figure 6. Root Mean Square Fluctuations (RMSFs) for individual POTRA domains.

Supporting Figure 7 Multiple sequence alignment of POTRA domains of *anaOmp85* and *ecBamA*.

Supporting Figure 8. PELDOR data analysis of inter-POTRA domain distances.

Supporting Figure 9. Comparison of experimentally obtained inter-domain distance distributions with distributions generated by MMM and MtsslWizard.

Supporting Figure 10. Comparison of inter-POTRA domain PELDOR time traces generated by MMM and MtsslWizard with experimental traces.

Supporting Figure 11. Comparison of experimentally obtained inter-POTRA domain distance distributions with distance distributions generated by rotamer libraries from Sezer and Hubbell.

Supporting Figure 12. Comparison of inter-POTRA domain PELDOR time traces generated by rotamer libraries from Sezer and Hubbell.

Supporting Figure 13. Comparison of experimentally obtained inter-POTRA domain distance distributions with those generated by rotamer libraries optimized for chi1 and chi3 angles from Sezer.

Supporting Figure 14. Comparison of inter-POTRA domain PELDOR time traces generated by rotamer libraries optimized for chi1 and chi3 angles from Sezer.

Supporting Figure 15. Comparison of simulated PELDOR time traces from rigid body refinement with experimental traces.

Supporting Figure 16. Comparison of simulated distance distributions from MD simulations and rigid body refinement.

Supporting Figure 17. Orientational space of POTRA domains of *in silico* spin-labeled Alr2269 sampled by MD simulations and Rosetta.

Supporting Figure 18. Predicted flexibility in POTRA domain pair *anaP1-anaP2*.

### Supporting Tables

Supporting Table S1. Oligonucleotides used for QuickChange PCR

Supporting Table S2. Comparison of PELDOR distance constraints with X-ray structure, MD and the best refined model of either rigid body or Rosetta refinement.

Supporting Table S3. Comparison of simulated distance constraints obtained for different rotamer libraries.

Supporting Table S4. Structural similarities of POTRA domains of anaOmp85 and BamA.

Supporting Table S5. Angles and scores of top 100 Rosetta models.

## Supporting References

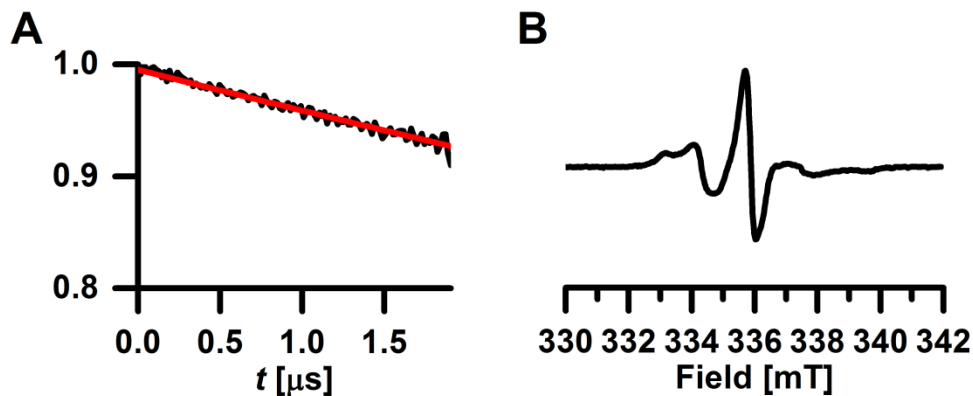

**Supporting Figure 1. EPR on singly-labeled POTRA domains.** POTRA domain P2 was labeled at position V370. (A) A monotonously decaying signal was observed, indicating the absence of specific inter-molecular interactions. (B) The cw-spectrum is indicative of a slow motion regime, and thus a hindered flexibility of the SL at this position.

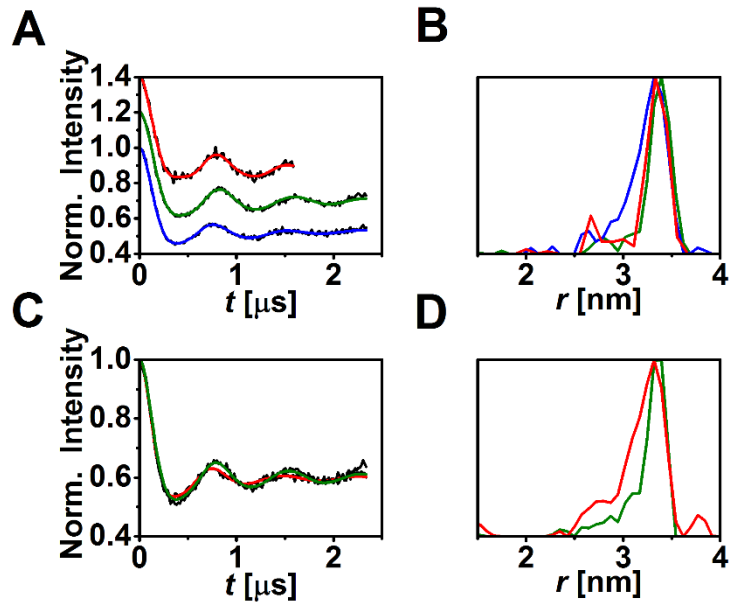

**Supporting Figure 2. Impact of cryoprotectants and freezing conditions on PELDOR results.** (A, B) Effect of different cryoprotectants on PELDOR measurements of the labeled mutant I292C/V370C. The background-corrected PELDOR time traces (A) and obtained distance distributions for different hydrophobic or hydrophilic cryoprotectants (B) is shown for 30% DMSO (red,  $3.3 \pm 0.2$  nm), 30% ethylene glycol (green,  $3.4 \pm 0.2$  nm), and 25% Ficoll 70 (blue,  $3.3 \pm 0.3$  nm). (C, D) Effect of different freezing procedures on PELDOR measurements of the I292C/V370C mutant. The background-corrected PELDOR time traces (C) and obtained distance distributions (D) for fast freezing of the samples by freeze-quench technique: with 30% glycerol (green,  $3.2 \pm 0.2$  nm), without glycerol (red,  $3.2 \pm 0.4$  nm). Likewise, no change was observed for different pH values (6–8,  $3.3 \pm 0.2$  nm; data not shown), and ionic strength (125–500mM NaCl,  $3.3 \pm 0.2$  nm; data not shown).

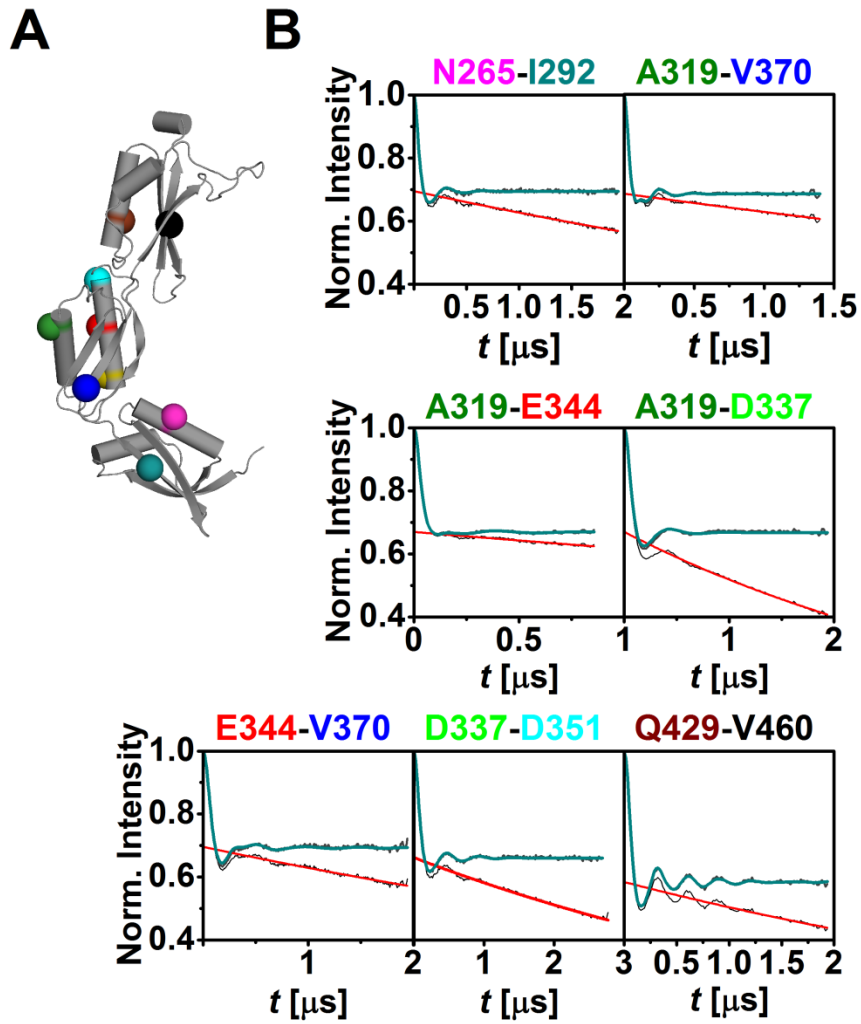

**Supporting Figure 3. Intra-POTRA domain distance constraints of individual POTRA domains.** (A) The crystal structure of the anaOmp85 POTRA domains indicating the spin-labeled residues. (B) The primary and background-corrected PELDOR time traces for measurements on the intra-domain double mutants with fits from Tikhonov regularization (cyan). The 3D backgrounds are shown in red.

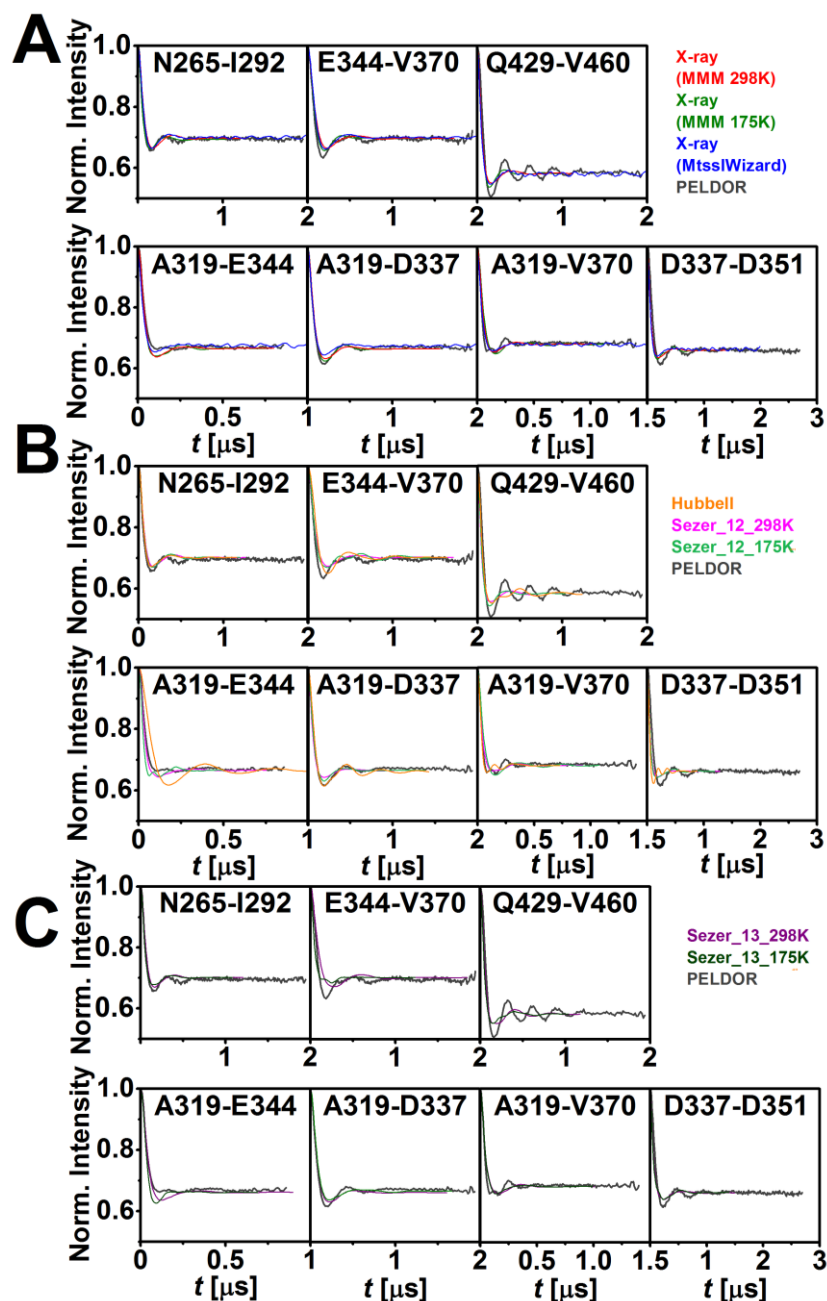

**Supporting Figure 4. Comparison of background-corrected PELDOR time traces of intra-POTRA domain distances of individual POTRA domains with simulated intramolecular dipolar evolution functions.** (A) Background-corrected PELDOR time traces generated on X-ray structure by MMM in 298 K mode (red), 175 K mode (green) and mtsslWizard using thorough search and loose vdW restraints (blue). (B) Background-corrected PELDOR time traces generated on X-ray structure by MMM using rotamer libraries optimized for chi1 and chi2 angles from Sezer et al. (41) at 298 K (magenta) and 175 K (light green), as well as rotamer libraries from Hubbell et al. (58) (orange). (C) Background-corrected PELDOR time traces generated on X-ray structure by MMM in using rotamer libraries optimized for chi1 and chi3 angles from Sezer et al. (41) at 298K (violet) and 175K (dark green).

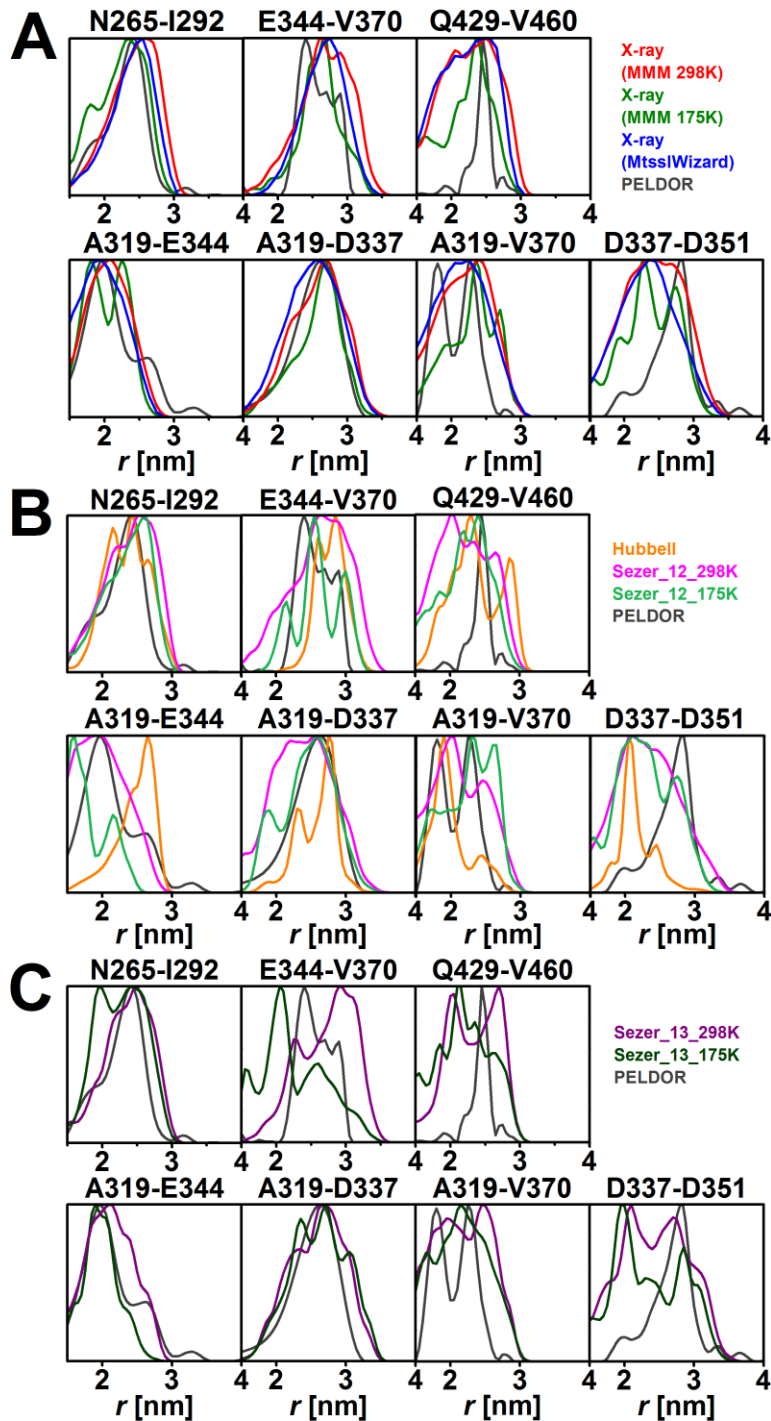

**Supporting Figure 5. Comparison of intra-POTRA domain distance distributions generated by various methods.** (A) Comparison of distance distributions generated on X-ray structure by MMM in 298 K mode (red), MMM in 175 K mode (green) and mtsslWizard using thorough search and loose vdW restraints (blue). (B) Comparison of distance distributions generated on X-ray structure by MMM using rotamer libraries optimized for chi1 and chi2 angles from Sezer et al. (41) at 298K (magenta) and 175K (light green) as well as rotamer library from Hubbell et al. (58) (orange). (C) Comparison of distance distributions generated on X-ray structure by MMM in using rotamer libraries optimized for chi1 and chi3 angles from Sezer et al. (41) at 298K (violet) and 175K (dark green).

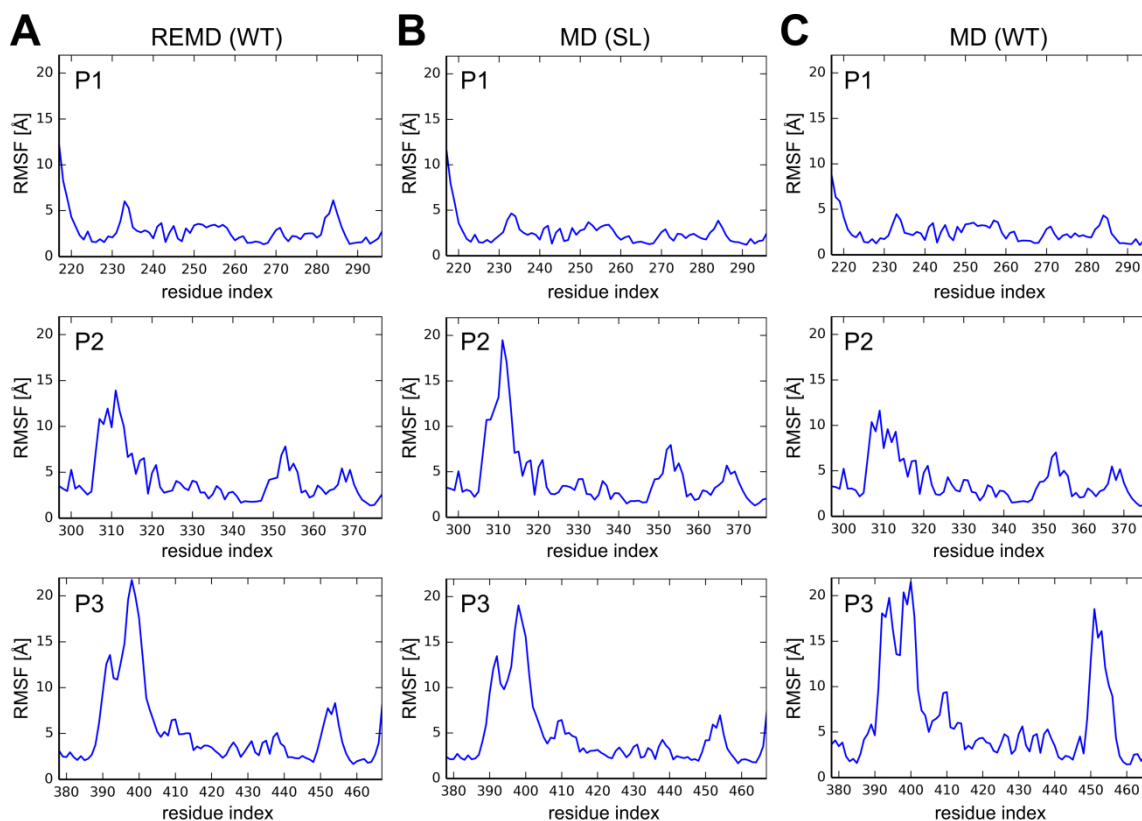

**Supporting Figure 6. Root Mean Square Fluctuations (RMSFs) for individual POTRA domains.**

The RMSF was calculated for all C $\alpha$  atoms of each POTRA domain of *anaOmp85* for the (A) wild-type REMD, (B) spin-labeled as well as (C) wild-type MD simulations. The residue indices correspond to the full-length protein.

```

Ana1_P1 221 VLVSEV--LVR--PQSGQ-----LTFELETQVYNVI---RTQPG-----RTITRSQL 260
Ana1_P2 297 PVLSKV--EIQANP--GTVN-----P--SVLPQATADEIF---RAQYG-----KILNLRDL 338
Ana1_P3 379 -VVENISVRFNE--GQDVNEQGQPIRGRTQDYIITREV---ELKPG-----QVFNRTIV 428
Ecol_P1 24 FVVKDI--HFE-----GL-----QRVAVGAALLSM---PVRITG-----DTVNDEDI 59
Ecol_P2 92 PIIASI--TFS-----GN-----KSVKDDMLKQNLASGVRVG-----ESLDRTTI 130
Ecol_P3 175 AEIQQT--NIV-----GN-----HAFTTDELISHF---QLRDEVPPWNVVVGDRKYQKQKL 219
Ecol_P4 266 YKLSGV--EVS-----GN-----LAGHSAETEQLE---KIEPG-----ELYNGTKV 301
Ecol_P5 347 FYVRKI--RFE-----GN-----DTSKDAVLRREM---RQMEG-----AWLGSDLV 382

Ana1_P1 261 QEDTNAIFGT---GFF---SNVQASP---EDTPLGVRVSEFTIVQPN 296
Ana1_P2 339 QEGIKELTKRYQDQGYV---LANVVGAPQ---VSENGVVTIQVAEG 378
Ana1_P3 429 QKDLQRFVCT---GLF-ED-VNVSTIDP---GTDP TKVNVVNVVVER 466
Ecol_P1 60 SNTIRALFAT---GNF-ED-VRVLRD-----GDTLLVQVKER 91
Ecol_P2 131 ADIEKLEDFYYSVGKYSAS-VKAVVTE---LPRNRVDLKLVFQEG 172
Ecol_P3 220 AGDLETILRSYYLDRGYARFN-IDSTQVSS--LTPDKKGIYVTVNITEG 263
Ecol_P4 302 TKMEDDIKLLGRYGYAYPR-VQSMPE---INDADKTVKLRVNDVAG 344
Ecol_P5 383 DQGERLNRL---GFF-ET-VDIDTQ--RVFGSDQVDVVVKVKER 421

```

**Supporting Figure 7 Multiple sequence alignment of POTRA domains of *anaOmp85* and *ecBamA*.** Sequence of individual POTRA domains *anaOmp85* and *ecBamA* were cut out and a multiple sequence alignment (MSA) was constructed with MAFFT. The MSA was visualized with Jalview using the ClustalX color code ([www.jalview.org](http://www.jalview.org)) (1). Residues, which were mutated to cysteine and spin labelled in this study, are highlighted by a red box.



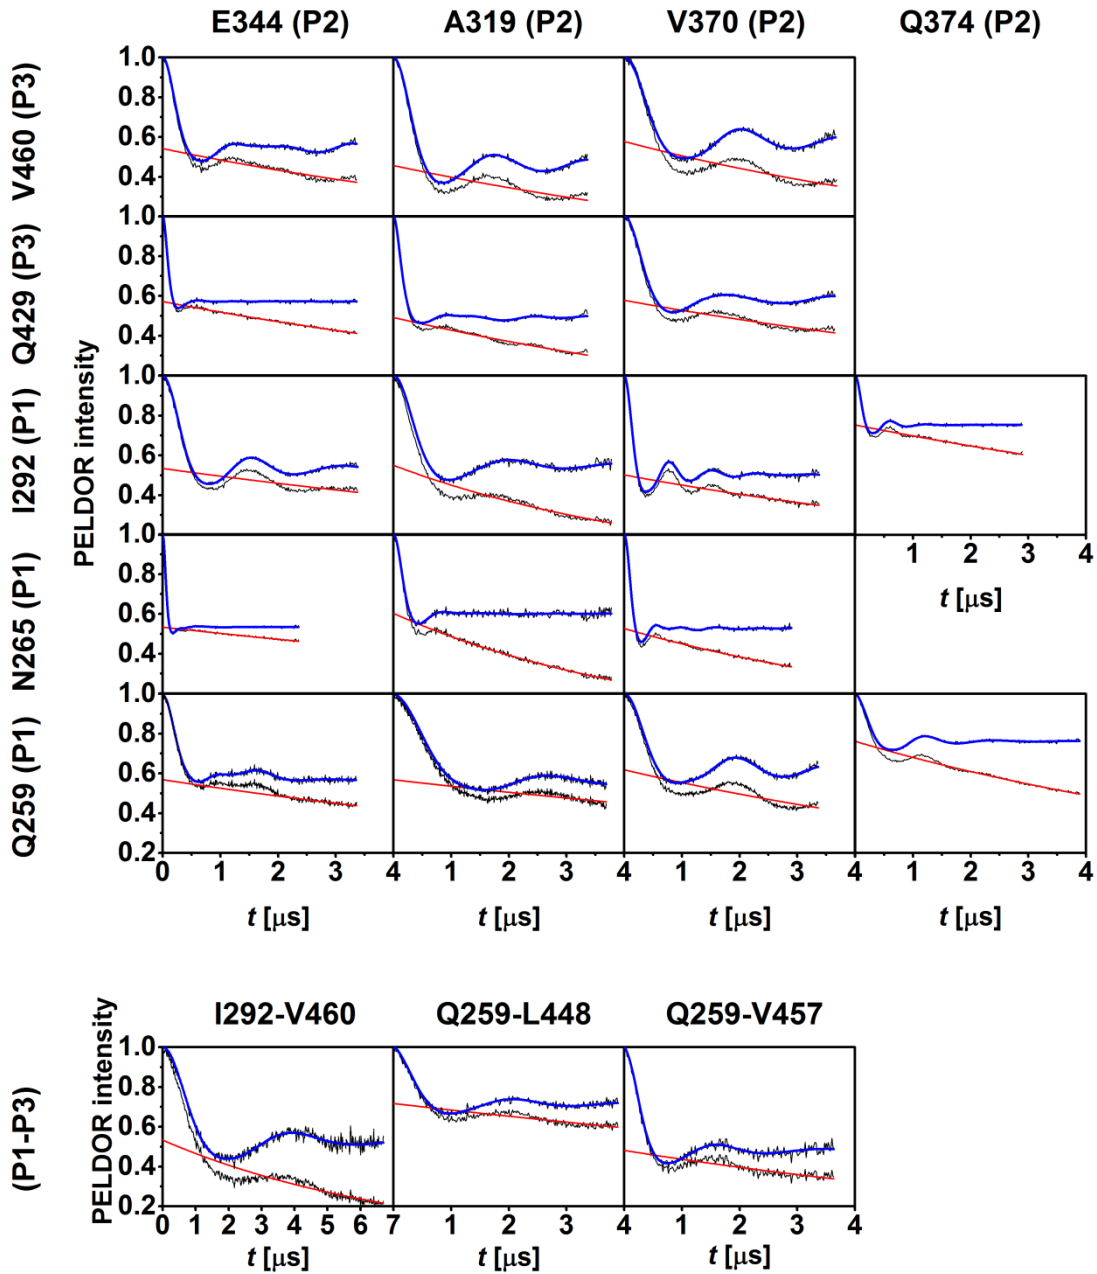

**Supporting Figure 8. PELDOR data analysis of inter-POTRA domain distances.** The primary and background-corrected PELDOR time traces for measurements on the inter-domain double mutants with fits from Tikhonov regularization (blue) are shown. The 3D-backgrounds are shown in red.

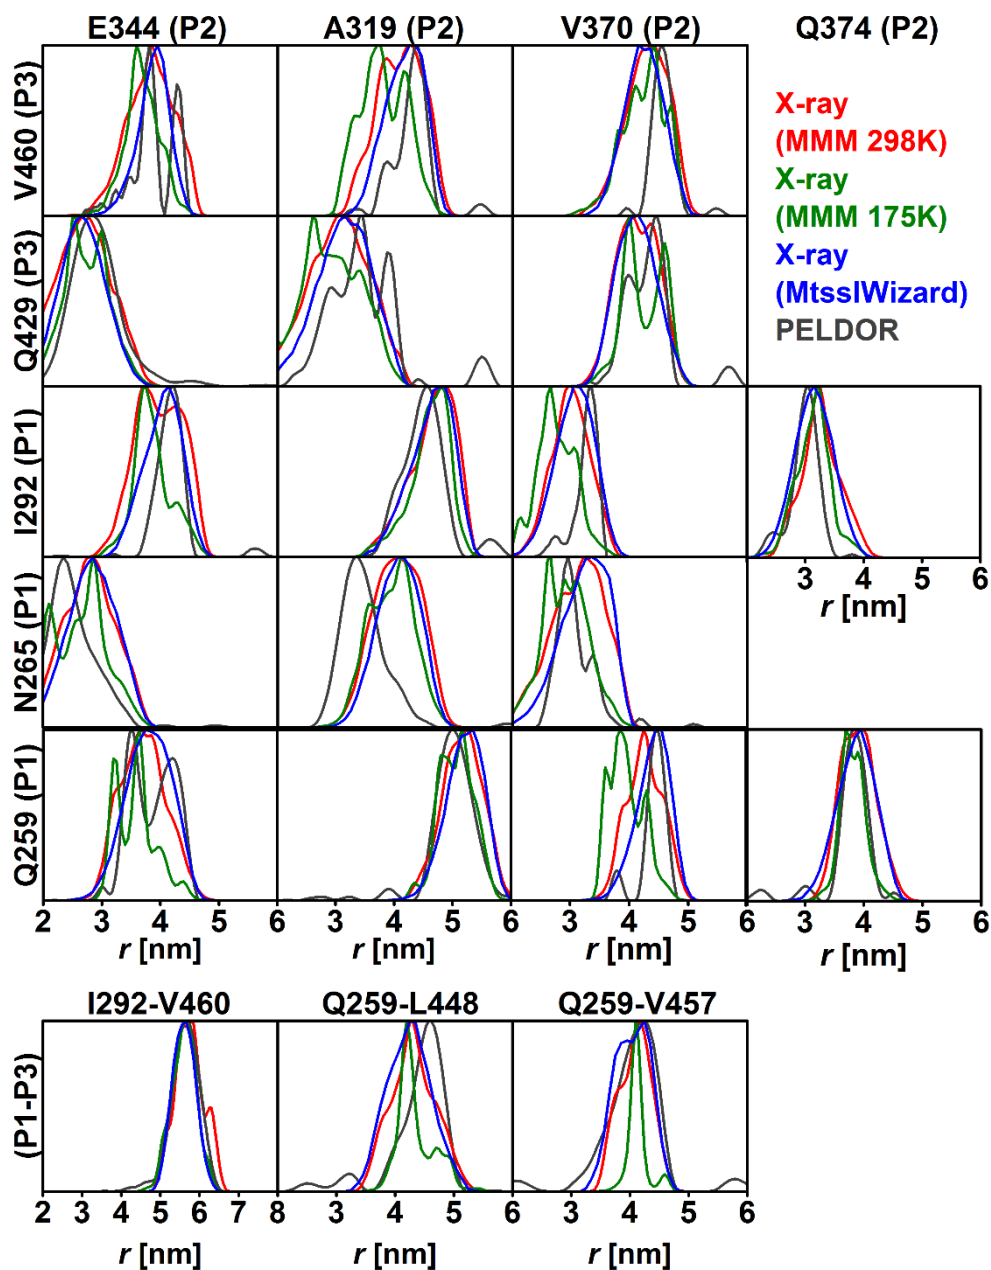

**Supporting Figure 9. Comparison of experimentally obtained inter-POTRA domain distance distributions with distributions generated by MMM and MtssIWizard.** Distance distributions generated on X-ray structure by MMM in 298 K mode (red), MMM in 175 K mode (green) and mtssIWizard using thorough search and loose vdW restraints (blue) are compared to the obtained distance distributions by Tikhonov regularization (black).

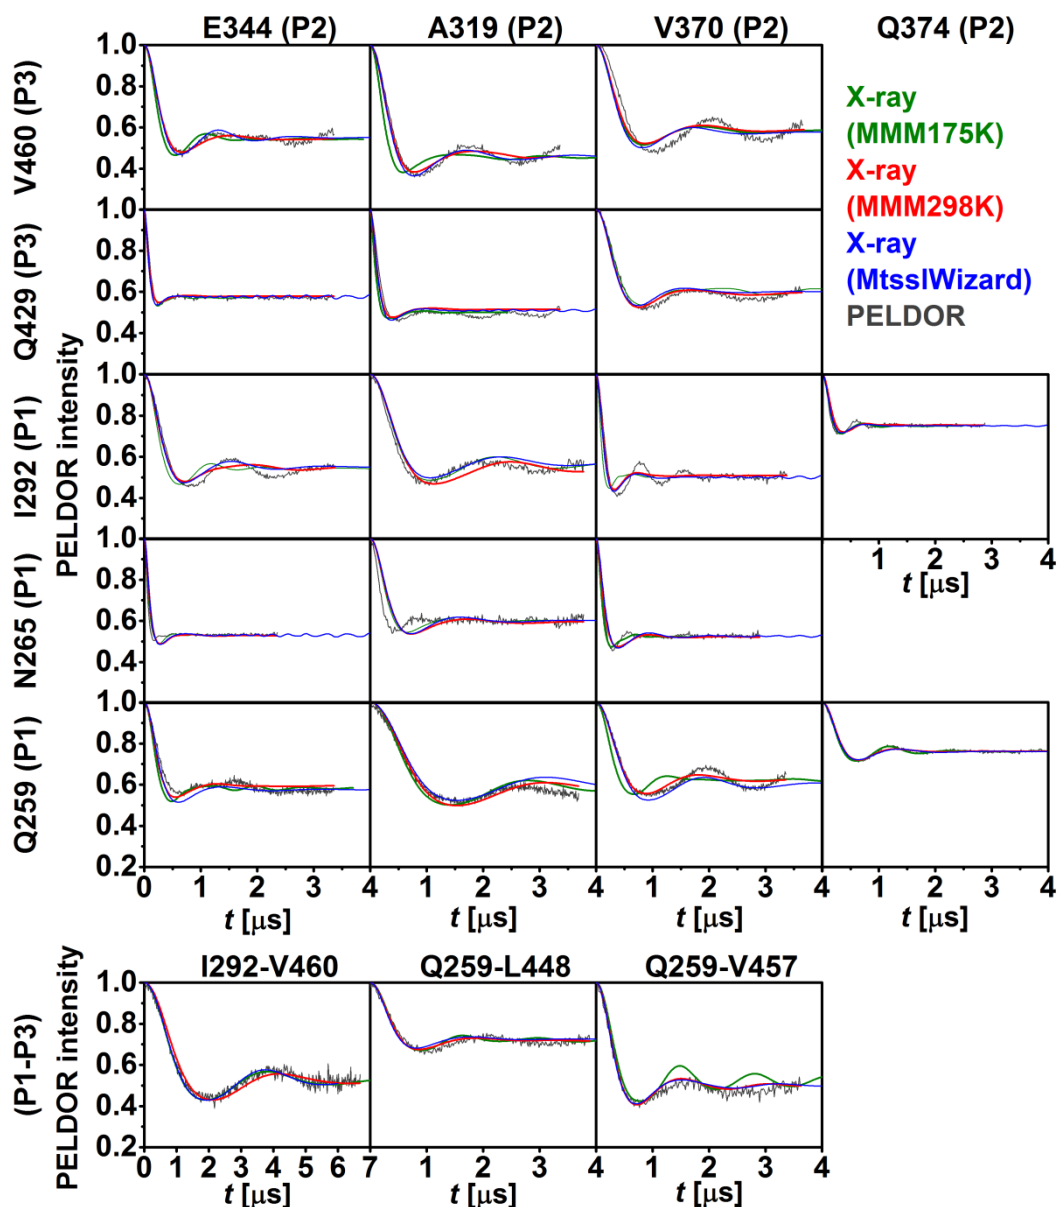

**Supporting Figure 10. Comparison of inter-POTRA domain PELDOR time traces generated by MMM and MtsslWizard with experimental traces.** Time traces generated on X-ray structure by MMM in 298 K mode (red), MMM in 175 K mode (green) were directly obtained from MMM software package. While time traces for distance distributions from mtsslWizard using thorough search and loose vdW restraints (cutoff 2.5Å, 5 clashes allowed) (blue) were obtained by ha home-written MATLAB® script.

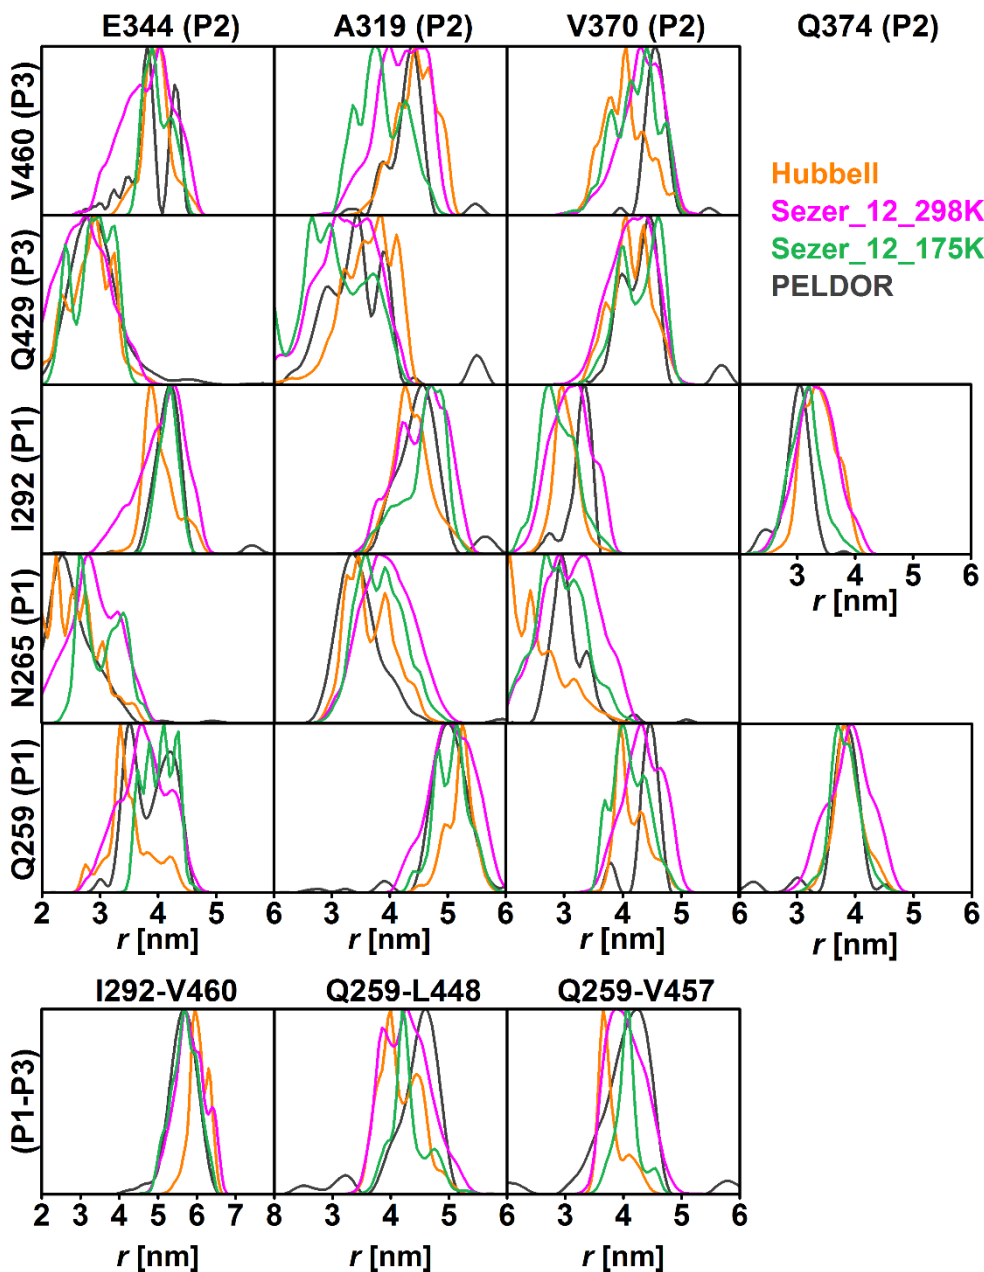

**Supporting Figure 11. Comparison of experimentally obtained inter-POTRA domain distance distributions with distance distributions generated by rotamer libraries from Sezer and Hubbell.** Distance distributions generated on X-ray structure by MMM using rotamer libraries optimized for chi1 and chi2 angles from Sezer et al. 298 K (magenta) and 175 K (light green) as well as rotamer library from Hubbell et al. (orange).

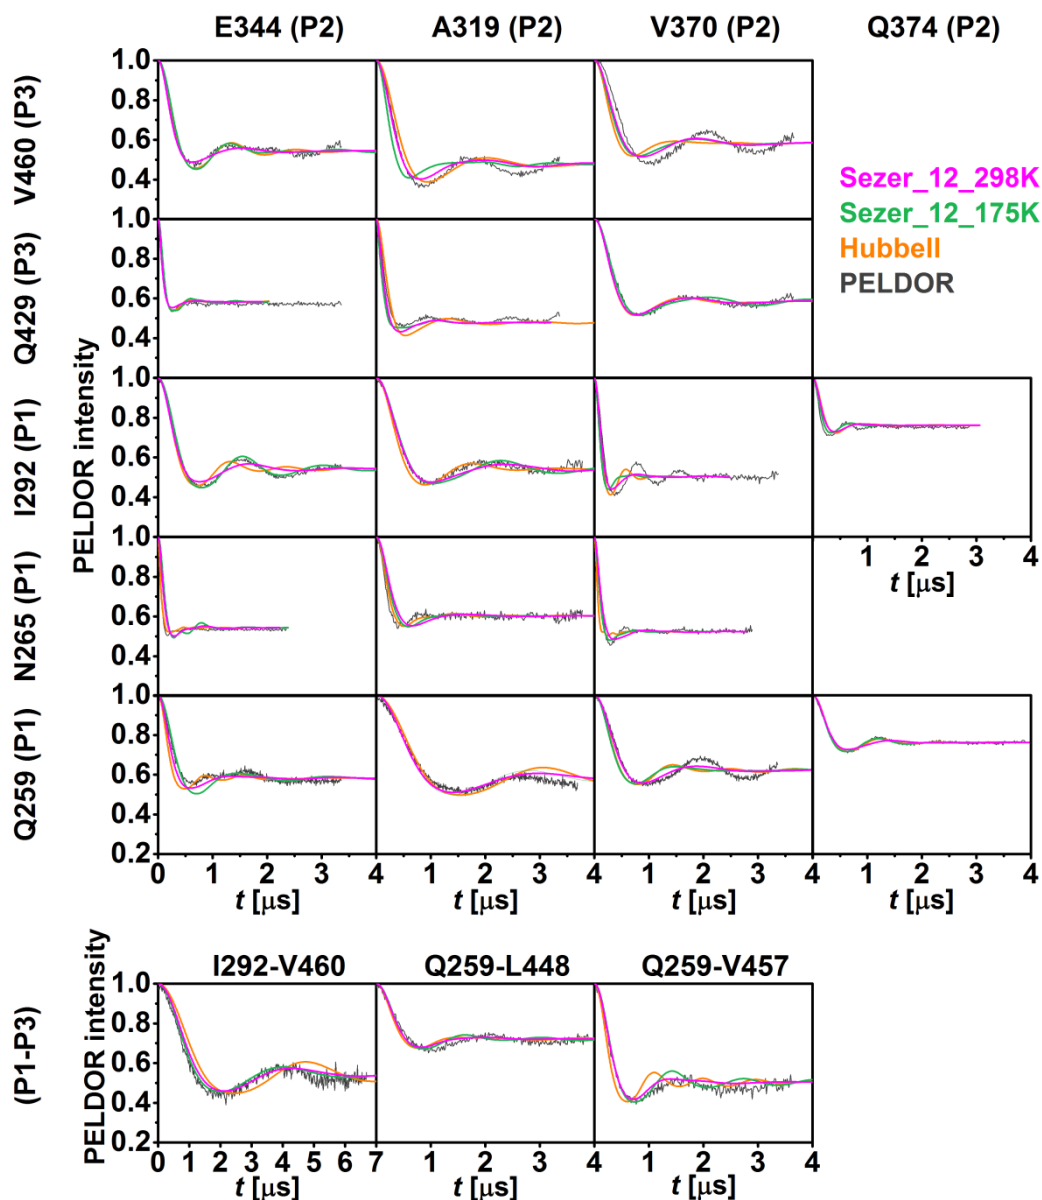

**Supporting Figure 12. Comparison of inter-POTRA domain PELDOR time traces generated by rotamer libraries from Sezer and Hubbell.** Distance distributions are generated on X-ray structure by MMM using rotamer libraries optimized for chi1 and chi2 angles from Sezer et al. at 298 K (magenta) and 175 K (light green) as well as rotamer library from Hubbell et al. (orange).

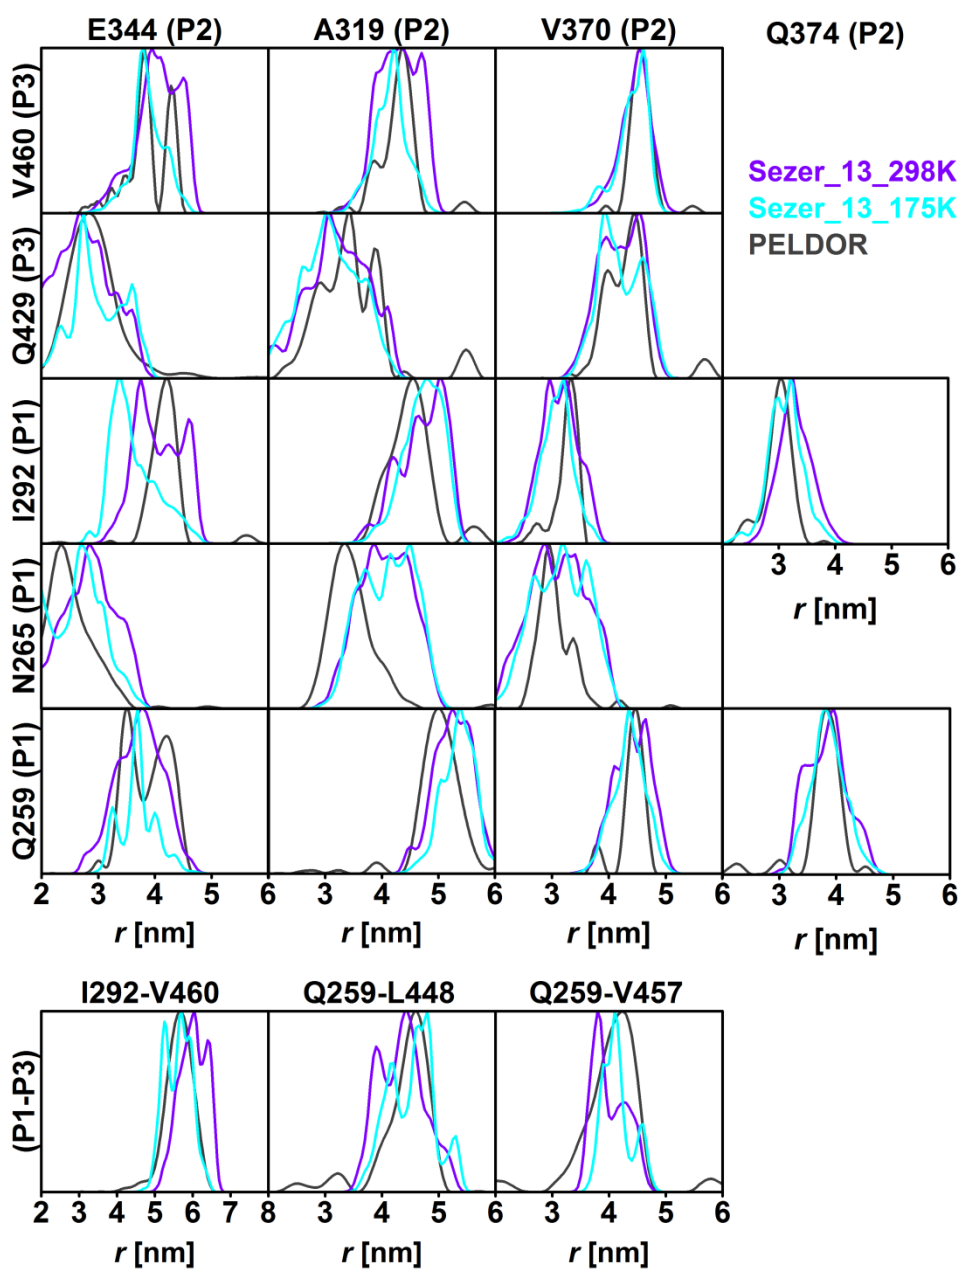

Supporting Figure 13. Comparison of experimentally obtained inter-POTRA domain distance distributions with those generated by rotamer libraries optimized for  $\chi_1$  and  $\chi_3$  angles from Sezer. Distributions are generated on X-ray structure using MMM at 298K (violet) and 175K (cyan).

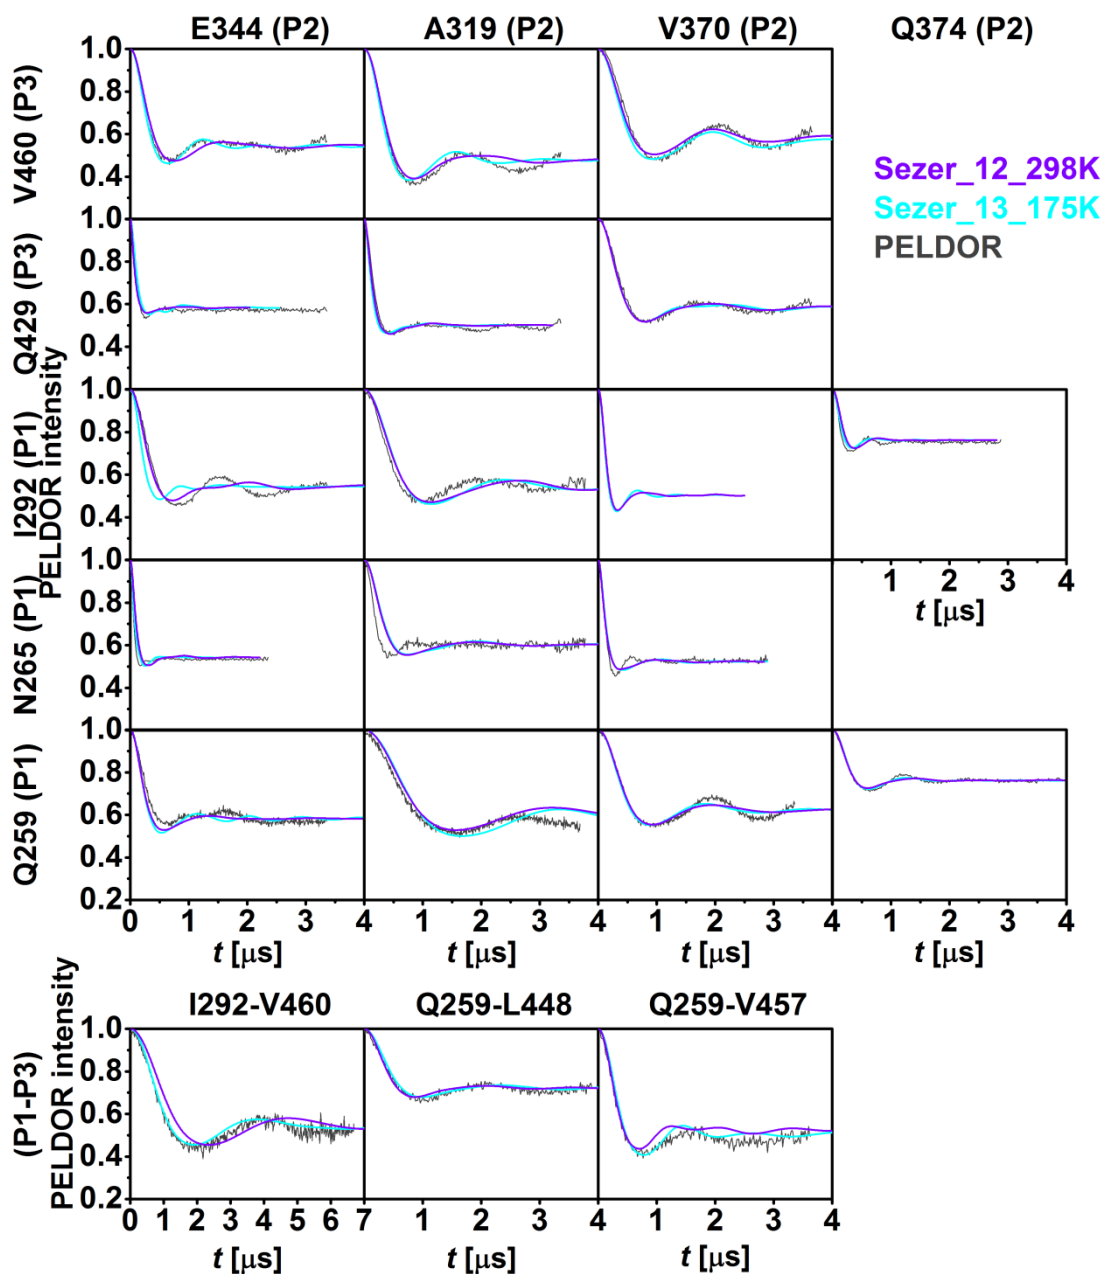

**Supporting Figure 14. Comparison of inter-POTRA domain PELDOR time traces generated by rotamer libraries optimized for chi1 and chi3 angles from Sezer.** Distance distributions are generated on X-ray structure by MMM using rotamer libraries optimized for chi1 and chi3 from Sezer et al. at 298K (violet) and 175K (cyan).

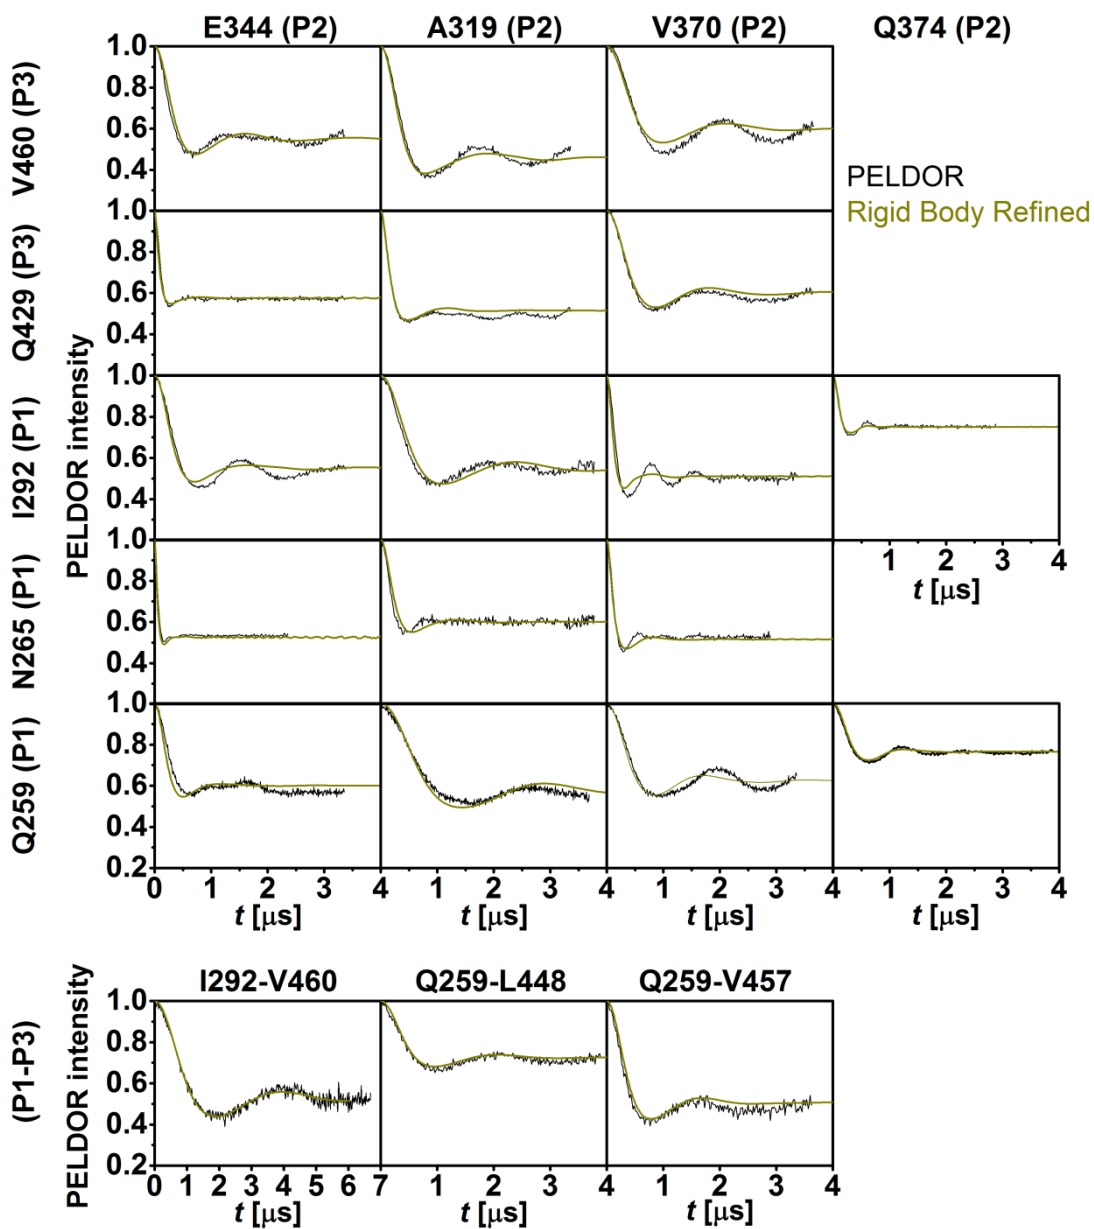

**Supporting Figure 15. Comparison of simulated PELDOR time traces from rigid body refinement with experimental traces.** Intramolecular dipolar evolution functions for rigid body refinement (dark yellow) are compared to the background-corrected experimental data (black).



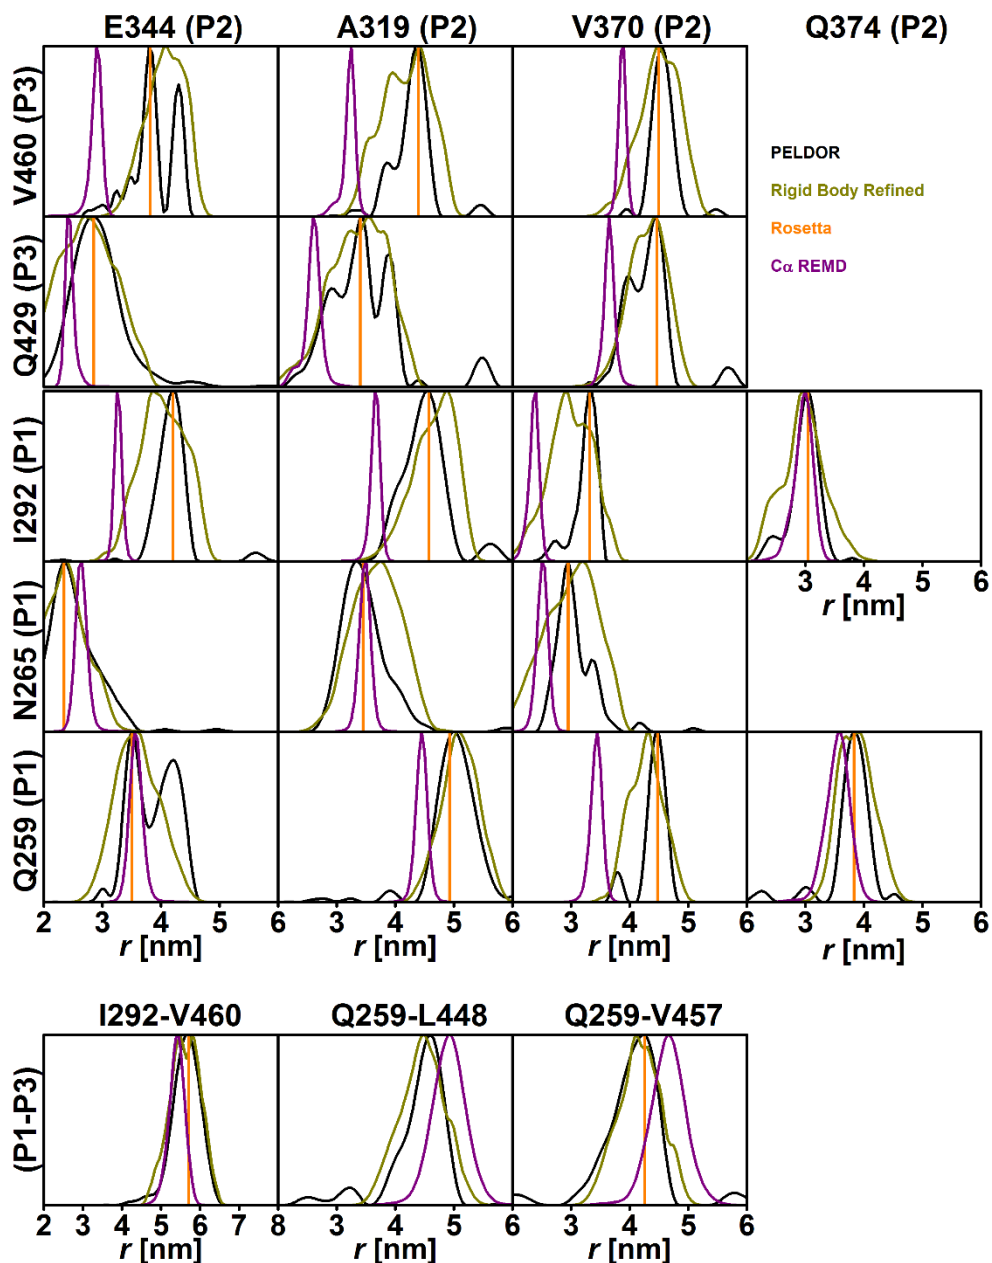

**Supporting Figure 16. Comparison of simulated distance distributions from MD simulations and rigid body refinement.** Distance distributions for C $\alpha$  atoms from REMD simulation (violet), are rigid body refinement (dark yellow) are compared to experimentally-obtained data (black). In addition the distances obtained by Rosetta refinement are shown as orange lines. SL pair 259-448 was not included in the Rosetta refinement to avoid a potential clash with neighboring SLs 448, 457 and 460.

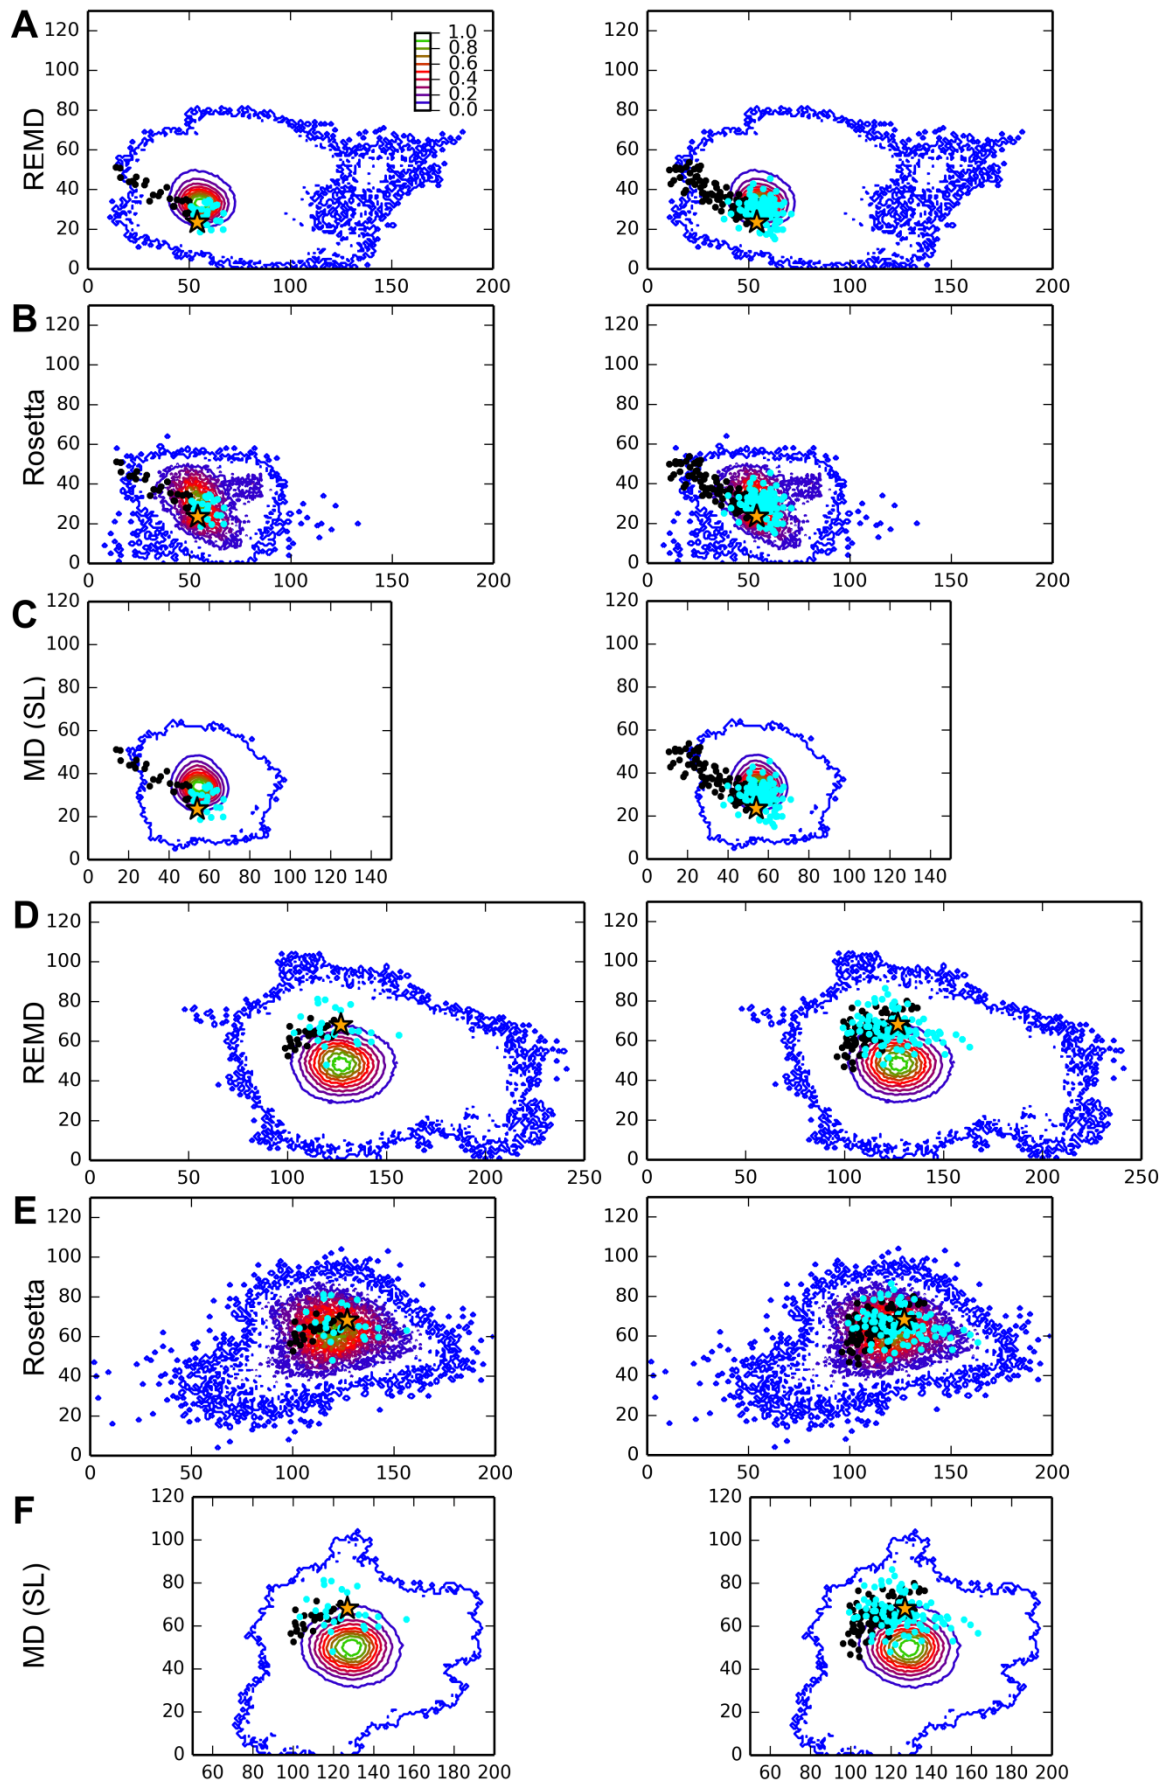

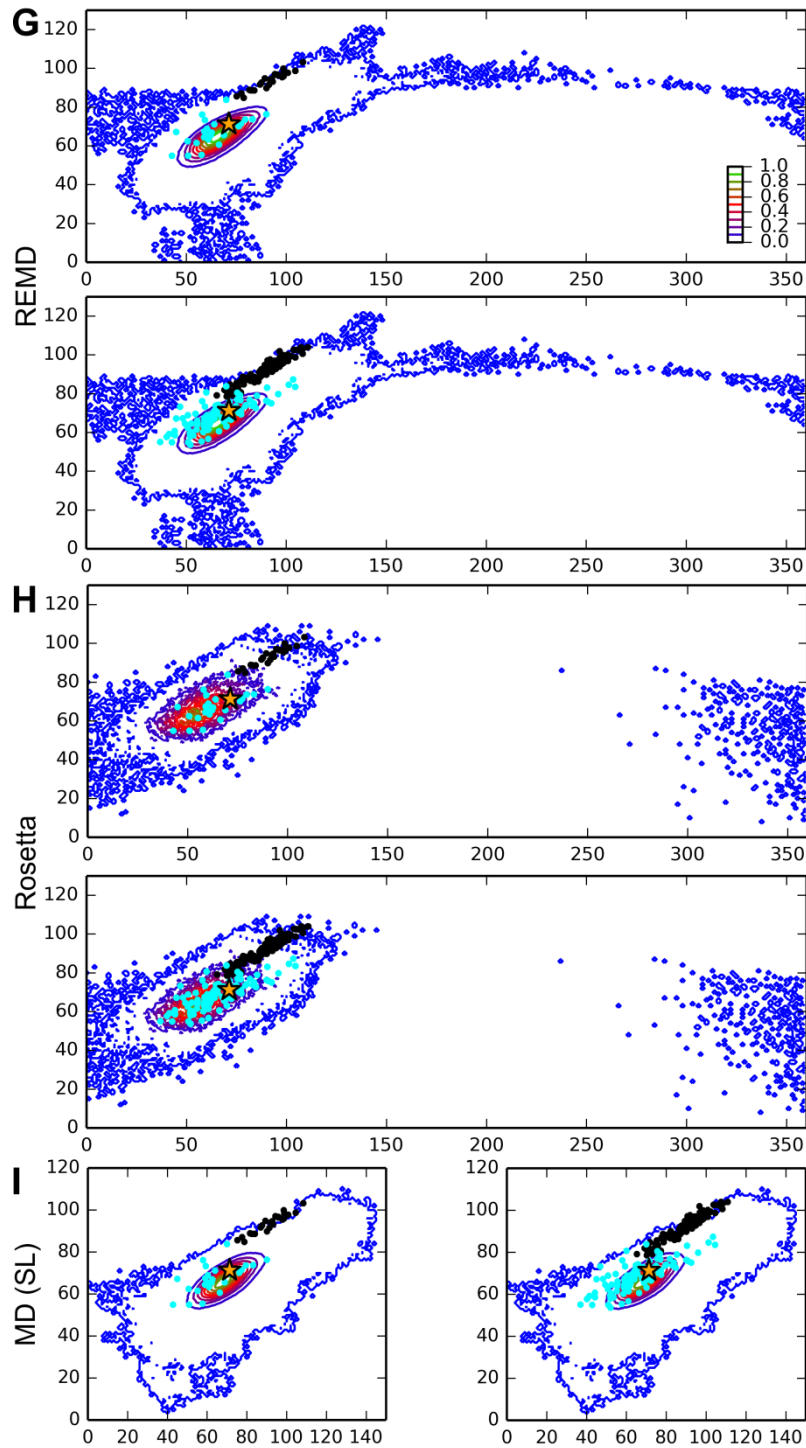

**Supporting Figure 17 A-I. Orientational space of POTRA domains of *in silico* spin-labeled Alr2269 sampled by MD simulations and Rosetta.** 2D contour plots show the frequency distribution of angular orientations of adjacent POTRA domain pairs of Alr2269 from MD simulations and Rosetta refinement. Just as in Fig. 5 the twist angle is plotted along the x axis and the swing angle along the y axis. (A-C) P2-P3. (D-F) P1-P3. (G-I) P1-P2. The top models from rigid body (filled black circles) and Rosetta (filled cyan circles) refinement are mapped onto the contour plots. In panels A-F, and I the top 25 and top 100 models are shown on the left and right panel, respectively. In panels G and H the upper panel holds the top 25 and the lower panel the top 100 models. In all plots the asterisk indicates the conformation of the respective domains in the X-ray structure.

**Supporting Figure 18. Predicted flexibility in POTRA domain pair *anaP1-anaP2*.** An ensemble of MD structures on the outer contour line of the elliptic region in Fig. 5D, representing the most populated orientations of *anaP1-anaP2* is shown superimposed onto *anaP2* from two different viewpoints.

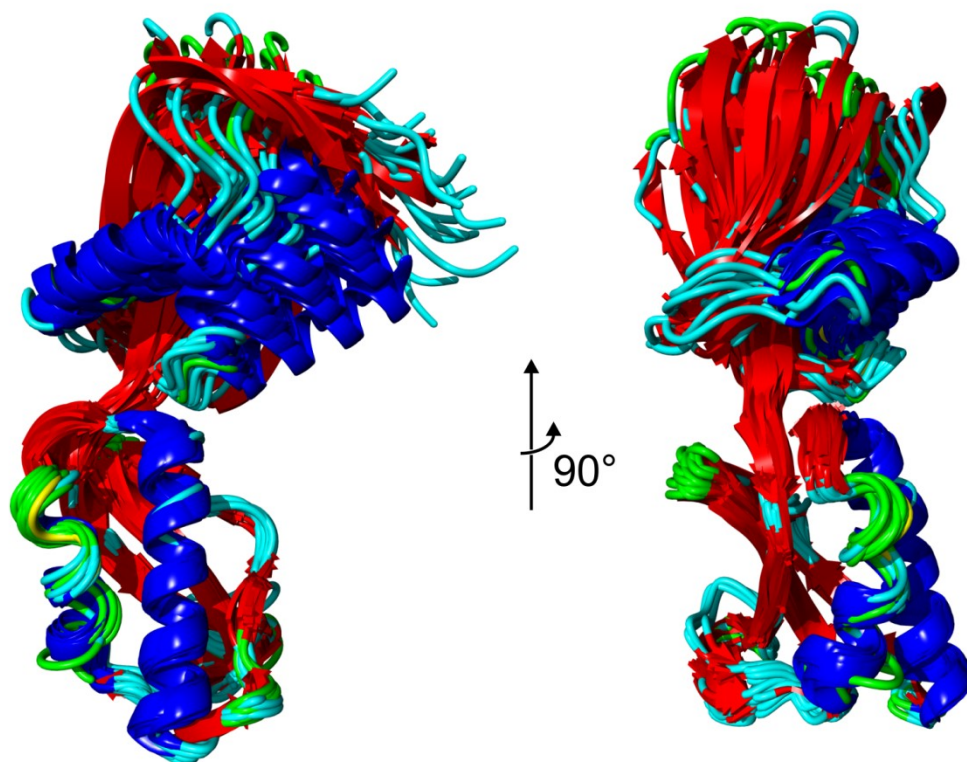

**Supporting Table 1. Oligonucleotides used for QuickChange PCR.**

| NAME        | SEQUENCE                                                                             |
|-------------|--------------------------------------------------------------------------------------|
| V460C       | TACAGACCCACCAAGGTGAATGTGTGCGTAAATGTGGTAGAACGCAGCGTCGAC<br>CACCACCACCACCACCACTGAGATCC |
| V457C       | GGTACGGATCCCACCAAGTGAATGTGGTGGTAAATGTGGTAG                                           |
| L448C       | GAAGACGTCAATGTTTCTGTGACCCCGGTACAGACCCACC                                             |
| Q429C       | GGTATTCAACCGCAACACCGTCTGCAAAGATCTACAACGCGTATTCGGGACAGG                               |
| V370C       | AGGTTTCCGAAAATGGATGCGTCACCCTGCAAGTAGC                                                |
| E344C       | CAAGAAGGGATTAAGTGCTTAACCAAACGTTATCAAGACC                                             |
| D337C,D351C | TTCTCAACTTGCGGTGTTTACAAGAAGGGATTAAGGAATTAACCAAACGTTATCAAtg<br>CCAAGGTTACGTTCTCGCC    |
| A319C       | GGACTAACGTTCCCTCAGTACTACCCAGTGTACTGCTGATGAAATTTCCGCGC                                |
| I292C       | CGAGTCAGCTTCTGTGTCCAGCCCAACCCCGTC                                                    |
| Q259C       | GGACAACCACCCGTTCTGTTTACAAGAAGATATCAACGCTATC                                          |
| Q374C       | CGCCAATGTTGTAGGaGcTCCCAGGTTTCCGAAAATGGAGTTGTCACCCTGtgtGTA<br>GCCGAAGGGGTCTG          |
| N256C       | TTCCCAGTTACAAGAAGATATctgCGCTATCTTTGGCACAGGC                                          |

**Supporting Table 2. Comparison of PELDOR distance constraints with X-ray structure, MD and the best refined model of either rigid body or Rosetta refinement.**

| Pair             | $\langle r \rangle_{\text{PELDOR}/r_{pk}}^a$ | $\langle r \rangle_{\text{X-ray}}^b$ | $\langle r \rangle_{\text{MD}}^c$ | $\langle r \rangle_{\text{Rigid Body}}^d$ | $\langle r \rangle_{\text{Rosetta}}^e$ |
|------------------|----------------------------------------------|--------------------------------------|-----------------------------------|-------------------------------------------|----------------------------------------|
| <b>N265-I292</b> | 2.3/2.4 (0.3)                                | 2.4 (0.4)                            | n.d.                              | n.d.                                      | 2.4                                    |
| <b>A319-D337</b> | 2.5/2.6 (0.4)                                | 2.6 (0.4)                            | n.d.                              | n.d.                                      | n.d.                                   |
| <b>A319-E344</b> | 2.1/2.0 (0.5)                                | 2.0 (0.4)                            | n.d.                              | n.d.                                      | 2.0.                                   |
| <b>A319-V370</b> | 2.1/1.8, 2.3 (0.3)                           | 2.1 (0.5)                            | n.d.                              | n.d.                                      | 1.8.                                   |
| <b>D337-D351</b> | 2.7/2.8 (0.4)                                | 2.4 (0.5)                            | n.d.                              | n.d.                                      | n.d.                                   |
| <b>E344-V370</b> | 2.5/2.4 (0.3)                                | 2.7 (0.4)                            | n.d.                              | n.d.                                      | 2.9                                    |
| <b>Q429-V460</b> | 2.4/2.5 (0.2)                                | 2.2 (0.4)                            | 2.1 (0.4)                         | n.d.                                      | 2.5                                    |
| <b>I292-A319</b> | 4.5/4.6 (0.5)                                | 4.7 (0.4)                            | 4.7 (0.4)                         | 4.7 (0.4)                                 | 4.6                                    |
| <b>I292-E344</b> | 4.2/4.2 (0.3)                                | 4.0 (0.4)                            | 4.0 (0.3)                         | 4.0 (0.5)                                 | 4.2                                    |
| <b>I292-V370</b> | 3.3/3.4 (0.2)                                | 3.1 (0.3)                            | 3.2 (0.3)                         | 3.0 (0.4)                                 | 3.3                                    |
| <b>N265-A319</b> | 3.5/3.4 (0.4)                                | 4.1 (0.4)                            | 4.2 (0.5)                         | 3.7 (0.6)                                 | 3.4                                    |
| <b>N265-E344</b> | 2.3/2.4 (0.4)                                | 2.8 (0.4)                            | 2.9 (0.3)                         | 2.3 (0.5)                                 | 2.3                                    |
| <b>N265-V370</b> | 3.0/3.0 (0.4)                                | 3.1 (0.5)                            | 3.3 (0.6)                         | 3.0 (0.6)                                 | 2.9                                    |
| <b>Q259-A319</b> | 5.3/ 5.0 (0.8)                               | 5.2 (0.4)                            | 5.6 (0.3)                         | 5.1 (0.4)                                 | 4.9                                    |
| <b>Q259-E344</b> | 4.3/3.5, 4.2 (1.3)                           | 3.7 (0.4)                            | 3.8 (0.4)                         | 3.6 (0.5)                                 | 3.5                                    |
| <b>Q259-V370</b> | 4.5/4.5 (0.5)                                | 4.3 (0.3)                            | 4.7 (0.2)                         | 4.3 (0.4)                                 | 4.5                                    |
| <b>Q374-Q259</b> | 3.8/3.8 (0.4)                                | 3.9 (0.3)                            | n.d.                              | 3.9 (0.4)                                 | 3.9                                    |
| <b>Q374-I292</b> | 3.0/3.0 (0.3)                                | 3.3 (0.4)                            | n.d.                              | 3.0 (0.3)                                 | 3.1                                    |
| <b>V460-A319</b> | 4.4/4.4 (0.3)                                | 4.2 (0.4)                            | 4.2 (0.3)                         | 4.2 (0.5)                                 | 4.4                                    |
| <b>V460-E344</b> | 3.9/3.8, 4.3 (0.5)                           | 3.9 (0.4)                            | 4.1 (0.4)                         | 4.1 (0.5)                                 | 3.8                                    |
| <b>V460-V370</b> | 4.6/4.6 (0.2)                                | 4.3 (0.4)                            | 4.8 (0.3)                         | 4.5 (0.4)                                 | 4.5                                    |
| <b>Q429-A319</b> | 3.4/3.4 (0.6)                                | 3.1 (0.5)                            | 3.1 (0.5)                         | 3.4 (0.6)                                 | 3.4                                    |
| <b>Q429-E344</b> | 2.9/2.8 (0.5)                                | 2.7 (0.5)                            | 2.9 (0.4)                         | 2.7 (0.7)                                 | 2.9                                    |
| <b>Q429-V370</b> | 4.3/4.5 (0.4)                                | 4.1 (0.4)                            | 4.3 (0.3)                         | 4.3 (0.4)                                 | 4.5                                    |
| <b>V460-I292</b> | 5.7/5.7 (0.6)                                | 5.7 (0.4)                            | 6.4 (0.3)                         | 5.6 (0.5)                                 | 5.7                                    |
| <b>V457-Q259</b> | 4.1/4.2 (0.8)                                | 4.1 (0.3)                            | 4.6 (0.4)                         | 4.2 (0.4)                                 | 4.2                                    |
| <b>L448-Q259</b> | 4.3/4.6 (0.7)                                | 4.3 (0.4)                            | 4.7 (0.5)                         | 4.5 (0.4)                                 | 4.6                                    |

<sup>a</sup> Distances in nm;  $\langle r \rangle$  is the mean distance;  $r_{pk}$  is the main distance; the standard deviations are given in parentheses.

<sup>b</sup> Distances are predicted by MMM in 298 K mode; the standard deviations are given in parentheses.

<sup>c</sup> Distances are predicted from MD simulations of spin-labeled mutants.

<sup>d</sup> Refined distances obtained from home-written script

<sup>e</sup> Refined distances obtained from Rosetta

**Supporting Table 3. Comparison of simulated distance constraints obtained for different rotamer libraries.**

| Pair      | <math>\langle r \rangle</math>X-ray<br>MMM175K | <math>\langle r \rangle</math>X-ray<br>Mtssl-<br>wizard | <math>\langle r \rangle</math>X-ray<br>Sezer12<br>175K | <math>\langle r \rangle</math>X-ray<br>Sezer12<br>298K | <math>\langle r \rangle</math>X-ray<br>Sezer13<br>175K | <math>\langle r \rangle</math>X-ray<br>Sezer13<br>298K | <math>\langle r \rangle</math>X-ray<br>Hubbell<br>298K |
|-----------|------------------------------------------------|---------------------------------------------------------|--------------------------------------------------------|--------------------------------------------------------|--------------------------------------------------------|--------------------------------------------------------|--------------------------------------------------------|
| N265-I292 | 2.3 (0.4)                                      | 2.4 (0.4)                                               | 2.3 (0.4)                                              | 2.3 (0.4)                                              | 2.2 (0.4)                                              | 2.3 (0.4)                                              | 2.3 (0.3)                                              |
| A319-D337 | 2.6 (0.4)                                      | 2.5 (0.4)                                               | 2.4 (0.4)                                              | 2.3 (0.5)                                              | 2.6 (0.4)                                              | 2.6 (0.4)                                              | 2.6 (0.3)                                              |
| A319-E344 | 2.0 (0.4)                                      | 2.0 (0.4)                                               | 1.6 (0.4)                                              | 1.9 (0.4)                                              | 2.0 (0.3)                                              | 2.1 (0.4)                                              | 2.4 (0.3)                                              |
| A319-V370 | 2.2 (0.4)                                      | 2.0 (0.5)                                               | 2.1 (0.5)                                              | 2.0 (0.5)                                              | 2.1 (0.4)                                              | 2.1 (0.5)                                              | 1.9 (0.4)                                              |
| D337-D351 | 2.3 (0.4)                                      | 2.3 (0.4)                                               | 2.2 (0.4)                                              | 2.3 (0.5)                                              | 2.2 (0.6)                                              | 2.4 (0.5)                                              | 2.2 (0.3)                                              |
| E344-V370 | 2.6 (0.3)                                      | 2.7 (0.3)                                               | 2.6 (0.4)                                              | 2.6 (0.4)                                              | 2.2 (0.5)                                              | 2.7 (0.4)                                              | 2.8 (0.2)                                              |
| Q429-V460 | 2.2 (0.4)                                      | 2.2 (0.4)                                               | 2.2 (0.4)                                              | 2.1 (0.5)                                              | 2.1 (0.5)                                              | 2.3 (0.4)                                              | 2.3 (0.4)                                              |
| I292-A319 | 4.6 (0.4)                                      | 4.6 (0.4)                                               | 4.6 (0.4)                                              | 4.5 (0.4)                                              | 4.7 (0.4)                                              | 4.7 (0.4)                                              | 4.4 (0.3)                                              |
| I292-E344 | 3.9 (0.3)                                      | 4.0 (0.3)                                               | 4.2 (0.7)                                              | 4.0 (0.4)                                              | 3.6 (0.4)                                              | 4.0 (0.4)                                              | 4.0 (0.3)                                              |
| I292-V370 | 2.8 (0.3)                                      | 3.1 (0.3)                                               | 2.9 (0.3)                                              | 3.3 (0.4)                                              | 3.1 (0.3)                                              | 3.1 (0.3)                                              | 3.0 (0.2)                                              |
| N265-A319 | 3.9 (0.4)                                      | 4.1 (0.4)                                               | 3.8 (0.4)                                              | 3.9 (0.4)                                              | 4.1 (0.5)                                              | 4.0 (0.4)                                              | 3.6 (0.4)                                              |
| N265-E344 | 2.7 (0.4)                                      | 2.8 (0.4)                                               | 3.0 (0.4)                                              | 2.9 (0.5)                                              | 2.6 (0.5)                                              | 2.8 (0.5)                                              | 2.4 (0.5)                                              |
| N265-V370 | 2.9 (0.4)                                      | 3.2 (0.4)                                               | 2.9 (0.4)                                              | 3.1 (0.5)                                              | 3.1 (0.5)                                              | 3.1 (0.5)                                              | 2.5 (0.5)                                              |
| Q259-A319 | 5.1 (0.3)                                      | 5.2 (0.3)                                               | 5.1 (0.3)                                              | 5.1 (0.4)                                              | 5.3 (0.3)                                              | 5.2 (0.4)                                              | 2.5 (0.6)                                              |
| Q259-E344 | 3.6 (0.4)                                      | 3.8 (0.4)                                               | 4.0 (0.3)                                              | 3.7 (0.4)                                              | 3.7 (0.3)                                              | 3.7 (0.4)                                              | 3.5 (0.4)                                              |
| Q259-V370 | 4.0 (0.3)                                      | 4.4 (0.3)                                               | 4.1 (0.3)                                              | 4.3 (0.3)                                              | 4.3 (0.3)                                              | 4.4 (0.3)                                              | 4.2 (0.3)                                              |
| Q374-Q259 | 3.8 (0.2)                                      | 3.9 (0.3)                                               | 3.8 (0.3)                                              | 3.9 (0.4)                                              | 3.8 (0.4)                                              | 3.8 (0.4)                                              | 3.9 (0.3)                                              |
| Q374-I292 | 3.1 (0.3)                                      | 3.2 (0.4)                                               | 3.2 (0.3)                                              | 3.3 (0.4)                                              | 3.3 (0.3)                                              | 3.3 (0.3)                                              | 3.4 (0.3)                                              |
| V460-A319 | 3.9 (0.4)                                      | 4.2 (0.3)                                               | 3.8 (0.4)                                              | 4.2 (0.4)                                              | 4.1 (0.3)                                              | 4.3 (0.4)                                              | 4.4 (0.4)                                              |
| V460-E344 | 3.8 (0.3)                                      | 3.9 (0.3)                                               | 4.0 (0.2)                                              | 3.8 (0.4)                                              | 3.9 (0.3)                                              | 4.0 (0.4)                                              | 4.0 (0.3)                                              |
| V460-V370 | 4.2 (0.4)                                      | 4.2 (0.3)                                               | 4.2 (0.4)                                              | 4.3 (0.4)                                              | 4.4 (0.3)                                              | 4.4 (0.3)                                              | 4.0 (0.4)                                              |
| Q429-A319 | 2.9 (0.6)                                      | 3.1 (0.5)                                               | 3.0 (0.6)                                              | 3.2 (0.5)                                              | 3.1 (0.5)                                              | 3.2 (0.5)                                              | 3.6 (0.4)                                              |
| Q429-E344 | 2.7 (0.4)                                      | 2.7 (0.4)                                               | 2.9 (0.3)                                              | 2.7 (0.5)                                              | 3.0 (0.5)                                              | 2.7 (0.6)                                              | 2.8 (0.4)                                              |
| Q429-V370 | 4.2 (0.4)                                      | 4.1 (0.4)                                               | 4.3 (0.4)                                              | 4.1 (0.4)                                              | 4.2 (0.4)                                              | 4.2 (0.4)                                              | 4.1 (0.4)                                              |
| V460-I292 | 5.6 (0.3)                                      | 5.6 (0.3)                                               | 5.7 (0.4)                                              | 5.8 (0.4)                                              | 5.6 (0.4)                                              | 6.0 (0.4)                                              | 6.0 (0.3)                                              |
| V457-Q259 | 4.1 (0.2)                                      | 4.0 (0.3)                                               | 4.2 (0.2)                                              | 4.0 (0.3)                                              | 4.1 (0.3)                                              | 4.0 (0.3)                                              | 3.8 (0.3)                                              |
| L448-Q259 | 4.4 (0.3)                                      | 4.2 (0.4)                                               | 4.3 (0.3)                                              | 4.3 (0.4)                                              | 4.5 (0.4)                                              | 4.3 (0.4)                                              | 4.2 (0.4)                                              |

**Supporting Table S4. Structural similarities of POTRA domains of *anaOmp85* and *ecBamA*.** For each POTRA pair (PDB: 3mc8, 5ayw) the C $\alpha$  RMSD [Å] after structural alignment with YASARA's MUSTANG plugin was determined. The background color gives the degree of similarity from white lowest similarity and black highest similarity.

|       | anaP2 | anaP3 | ecP1  | ecP2  | ecP3  | ecP4  | ecP5  |
|-------|-------|-------|-------|-------|-------|-------|-------|
| anaP1 | 1.966 | 1.006 | 1.056 | 1.561 | 1.437 | 1.367 | 1.279 |
| anaP2 |       | 1.707 | 2.009 | 2.023 | 1.597 | 1.665 | 1.888 |
| anaP3 |       |       | 1.186 | 1.941 | 1.748 | 1.670 | 1.209 |
| ecP1  |       |       |       | 1.443 | 1.490 | 1.463 | 1.300 |
| ecP2  |       |       |       |       | 1.515 | 1.768 | 1.582 |
| ecP3  |       |       |       |       |       | 1.580 | 1.503 |
| ecP4  |       |       |       |       |       |       | 1.387 |

**Supporting Table S5. Angles and scores of top 100 Rosetta models.**

Twist and swing angles are given in columns 1-4 for adjacent POTRA domain pairs, in columns 5 and 6 for P1-P3. The last two columns hold the Rosetta score and the distance constraint score. <sup>a</sup> The score in column 7 was calculated by subtracting the atom pair constraint score from the total score. <sup>b</sup> The distance constraint score in column 8 was calculated as follows:

$\frac{\text{atom pair constraint score}}{\text{constraint score weight} * \text{number of constraints}}$  with a weight of 4 and in total 24 constraints.

| Twist (P1-P2) | Swing (P1-P2) | Twist (P2-P3) | Swing (P2-P3) | Twist (P1-P3) | Swing (P1-P3) | Rosetta score <sup>a</sup> | distance constraint score <sup>b</sup> |
|---------------|---------------|---------------|---------------|---------------|---------------|----------------------------|----------------------------------------|
| 66.4          | 60.6          | 52.2          | 27.3          | 119.6         | 48.0          | -427.232                   | 0.9762                                 |
| 62.7          | 66.9          | 50.9          | 31.5          | 117.2         | 69.1          | -428.915                   | 0.9746                                 |
| 59.3          | 73.3          | 65.4          | 24.1          | 126.8         | 75.6          | -433.18                    | 0.9745                                 |
| 76.2          | 70.1          | 58.8          | 22.2          | 135.6         | 58.6          | -426.902                   | 0.9742                                 |
| 62.2          | 65.6          | 53.8          | 29.9          | 118.7         | 57.3          | -424.715                   | 0.9742                                 |
| 60.9          | 63.4          | 56.5          | 25.9          | 120.2         | 61.9          | -431.877                   | 0.974                                  |
| 45.0          | 67.2          | 60.9          | 19.6          | 106.6         | 72.4          | -425.407                   | 0.974                                  |
| 90.0          | 76.3          | 61.7          | 31.2          | 156.3         | 63.0          | -434.098                   | 0.974                                  |
| 50.7          | 62.4          | 63.5          | 24.3          | 116.2         | 66.7          | -426.334                   | 0.9739                                 |
| 68.8          | 65.6          | 59.7          | 34.6          | 132.5         | 65.2          | -430.368                   | 0.9739                                 |
| 60.7          | 65.3          | 58.5          | 33.1          | 123.6         | 63.4          | -430.716                   | 0.9737                                 |
| 79.5          | 73.6          | 53.3          | 25.9          | 135.9         | 65.0          | -438.231                   | 0.9736                                 |
| 71.3          | 69.7          | 60.3          | 33.9          | 135.0         | 59.9          | -428.997                   | 0.9734                                 |
| 42.8          | 54.9          | 56.3          | 30.0          | 103.3         | 64.2          | -429.479                   | 0.9734                                 |
| 77.3          | 71.5          | 62.9          | 31.9          | 142.2         | 64.3          | -432.622                   | 0.9734                                 |
| 59.0          | 67.5          | 53.4          | 29.1          | 115.3         | 60.4          | -424.882                   | 0.9731                                 |
| 60.4          | 68.9          | 53.2          | 28.2          | 116.4         | 64.4          | -427.321                   | 0.973                                  |
| 55.2          | 61.5          | 67.0          | 28.0          | 119.0         | 80.9          | -434.847                   | 0.9729                                 |
| 58.9          | 64.5          | 58.8          | 27.3          | 115.4         | 79.2          | -430.594                   | 0.9728                                 |
| 83.1          | 73.8          | 57.8          | 33.8          | 142.3         | 59.7          | -431.497                   | 0.9728                                 |
| 58.0          | 76.1          | 55.5          | 18.6          | 115.2         | 81.2          | -427.361                   | 0.9726                                 |
| 70.0          | 83.8          | 51.8          | 30.7          | 124.1         | 77.0          | -424.906                   | 0.9726                                 |
| 64.0          | 71.1          | 66.8          | 19.8          | 131.8         | 78.5          | -446.642                   | 0.9726                                 |
| 50.9          | 54.9          | 59.0          | 29.2          | 111.1         | 67.1          | -438.485                   | 0.9726                                 |
| 57.7          | 55.4          | 63.8          | 32.3          | 123.8         | 64.4          | -427.586                   | 0.9725                                 |
| 77.4          | 69.3          | 62.9          | 15.1          | 137.8         | 58.1          | -426.479                   | 0.9725                                 |
| 73.2          | 71.7          | 57.6          | 24.6          | 130.8         | 62.7          | -435.525                   | 0.9725                                 |
| 60.0          | 80.7          | 45.1          | 20.6          | 106.7         | 78.9          | -424.411                   | 0.9725                                 |
| 44.2          | 60.7          | 60.7          | 17.8          | 107.7         | 64.8          | -428.938                   | 0.9724                                 |
| 61.0          | 56.7          | 66.2          | 32.1          | 129.5         | 64.1          | -425.634                   | 0.9724                                 |
| 65.3          | 71.7          | 60.4          | 26.8          | 128.2         | 70.2          | -430.184                   | 0.9723                                 |
| 58.9          | 63.0          | 49.5          | 30.8          | 112.4         | 67.1          | -435.095                   | 0.9722                                 |
| 103.4         | 87.4          | 53.1          | 36.2          | 159.5         | 60.6          | -438.027                   | 0.9722                                 |
| 54.6          | 69.6          | 63.4          | 27.7          | 121.8         | 83.4          | -429.475                   | 0.9721                                 |
| 52.0          | 58.0          | 62.8          | 27.9          | 115.4         | 70.2          | -426.927                   | 0.9721                                 |
| 61.0          | 63.2          | 62.5          | 35.1          | 124.2         | 78.2          | -433.354                   | 0.972                                  |

|       |      |      |      |       |      |          |        |
|-------|------|------|------|-------|------|----------|--------|
| 72.4  | 66.6 | 51.3 | 34.5 | 126.4 | 55.6 | -434.568 | 0.972  |
| 101.2 | 84.6 | 45.7 | 29.9 | 147.8 | 64.4 | -435.971 | 0.9719 |
| 52.6  | 64.6 | 62.1 | 16.3 | 111.8 | 78.2 | -430.736 | 0.9718 |
| 72.4  | 68.6 | 41.2 | 27.8 | 115.7 | 65.8 | -429.313 | 0.9718 |
| 92.5  | 75.1 | 52.9 | 35.7 | 149.8 | 59.1 | -432.275 | 0.9718 |
| 75.5  | 77.0 | 49.5 | 27.2 | 125.0 | 66.9 | -428.126 | 0.9718 |
| 41.4  | 59.2 | 63.0 | 22.1 | 108.8 | 70.9 | -426.711 | 0.9718 |
| 69.1  | 65.9 | 48.5 | 28.9 | 119.7 | 57.6 | -430.954 | 0.9717 |
| 49.4  | 64.5 | 55.3 | 26.0 | 107.6 | 68.2 | -424.655 | 0.9717 |
| 65.9  | 74.2 | 57.2 | 27.6 | 125.2 | 79.6 | -429.128 | 0.9717 |
| 60.4  | 63.0 | 57.6 | 32.7 | 121.8 | 63.8 | -434.068 | 0.9717 |
| 84.7  | 72.7 | 56.0 | 32.9 | 145.7 | 61.8 | -436.232 | 0.9716 |
| 71.6  | 75.8 | 53.1 | 34.3 | 128.0 | 60.3 | -425.779 | 0.9716 |
| 61.7  | 66.0 | 45.1 | 33.2 | 110.2 | 52.8 | -425.604 | 0.9716 |
| 76.3  | 70.4 | 52.8 | 32.2 | 131.8 | 57.3 | -438.73  | 0.9715 |
| 55.5  | 63.9 | 64.0 | 23.5 | 121.7 | 60.7 | -428.583 | 0.9714 |
| 62.6  | 69.4 | 62.5 | 30.5 | 128.2 | 70.1 | -425.372 | 0.9714 |
| 79.9  | 74.1 | 49.3 | 33.0 | 132.9 | 64.9 | -425.776 | 0.9714 |
| 59.1  | 65.9 | 50.6 | 40.3 | 117.1 | 52.9 | -424.811 | 0.9713 |
| 52.0  | 53.7 | 60.8 | 37.3 | 118.1 | 62.4 | -426.632 | 0.9713 |
| 50.8  | 68.9 | 63.7 | 19.7 | 116.1 | 67.3 | -428.57  | 0.9713 |
| 40.2  | 57.7 | 64.1 | 27.5 | 107.5 | 64.7 | -424.968 | 0.9712 |
| 53.5  | 58.5 | 58.3 | 25.5 | 111.8 | 70.1 | -434.722 | 0.9712 |
| 90.9  | 75.8 | 55.5 | 28.1 | 148.3 | 63.6 | -434.23  | 0.9712 |
| 61.2  | 65.2 | 61.5 | 30.0 | 125.4 | 68.6 | -427.366 | 0.9712 |
| 66.3  | 73.2 | 56.0 | 30.5 | 125.8 | 68.0 | -436.535 | 0.9711 |
| 58.5  | 60.2 | 67.5 | 33.5 | 131.2 | 62.5 | -424.536 | 0.9711 |
| 75.5  | 80.5 | 56.0 | 25.0 | 130.3 | 65.9 | -431.546 | 0.9711 |
| 64.3  | 69.6 | 60.7 | 28.7 | 127.7 | 65.9 | -428.73  | 0.9711 |
| 48.3  | 67.3 | 63.0 | 21.1 | 112.5 | 72.3 | -426.236 | 0.971  |
| 81.8  | 76.8 | 54.1 | 30.8 | 141.7 | 63.3 | -438.085 | 0.971  |
| 64.6  | 71.0 | 57.5 | 35.8 | 125.2 | 76.0 | -425.252 | 0.9709 |
| 74.8  | 73.6 | 57.2 | 26.8 | 134.0 | 70.6 | -436.696 | 0.9709 |
| 64.9  | 73.0 | 59.0 | 30.1 | 126.8 | 68.1 | -430.512 | 0.9709 |
| 85.3  | 78.9 | 52.4 | 36.6 | 135.2 | 53.2 | -429.014 | 0.9709 |
| 63.9  | 67.9 | 59.0 | 31.4 | 126.1 | 67.8 | -426.678 | 0.9708 |
| 67.8  | 67.6 | 55.6 | 18.0 | 123.8 | 62.4 | -425.551 | 0.9707 |
| 77.0  | 76.6 | 58.4 | 30.2 | 139.9 | 70.9 | -427.618 | 0.9707 |
| 51.8  | 59.4 | 60.6 | 45.5 | 122.1 | 51.5 | -424.932 | 0.9707 |
| 61.0  | 61.4 | 37.8 | 25.1 | 101.5 | 63.7 | -429.836 | 0.9707 |
| 76.8  | 79.3 | 55.3 | 28.5 | 137.6 | 69.3 | -425.145 | 0.9706 |
| 55.5  | 66.1 | 59.8 | 34.5 | 120.0 | 68.6 | -424.392 | 0.9705 |
| 72.4  | 67.1 | 59.0 | 33.6 | 136.2 | 63.4 | -434.194 | 0.9705 |
| 70.1  | 63.1 | 59.7 | 33.8 | 134.1 | 60.8 | -424.863 | 0.9705 |
| 65.6  | 69.7 | 58.7 | 17.4 | 126.0 | 71.4 | -435.61  | 0.9704 |
| 61.7  | 64.2 | 56.9 | 30.4 | 121.8 | 65.5 | -425.225 | 0.9704 |
| 104.5 | 83.5 | 56.6 | 34.5 | 163.2 | 56.7 | -434.33  | 0.9704 |
| 64.1  | 67.2 | 59.1 | 27.0 | 125.8 | 64.1 | -433.017 | 0.9704 |
| 68.4  | 72.9 | 39.8 | 34.0 | 110.6 | 55.7 | -427.262 | 0.9704 |
| 73.5  | 72.6 | 48.6 | 27.6 | 124.0 | 71.0 | -432.072 | 0.9704 |
| 83.7  | 75.1 | 55.4 | 32.4 | 144.5 | 63.8 | -431.852 | 0.9704 |
| 69.4  | 66.5 | 55.2 | 30.3 | 128.3 | 61.9 | -428.559 | 0.9704 |
| 37.0  | 55.1 | 57.2 | 33.3 | 99.2  | 66.5 | -424.334 | 0.9704 |
| 90.4  | 83.1 | 50.6 | 37.5 | 146.4 | 61.0 | -433.895 | 0.9703 |
| 46.9  | 73.3 | 71.0 | 27.7 | 120.5 | 86.4 | -424.909 | 0.9703 |
| 67.7  | 72.8 | 57.2 | 40.3 | 130.7 | 64.0 | -426.182 | 0.9703 |
| 75.6  | 72.0 | 46.3 | 29.5 | 124.4 | 67.5 | -430.156 | 0.9703 |
| 52.3  | 60.3 | 55.9 | 31.8 | 112.4 | 63.3 | -428.166 | 0.9703 |
| 44.2  | 58.6 | 56.0 | 28.0 | 103.9 | 69.2 | -428.226 | 0.9702 |
| 55.5  | 65.2 | 64.5 | 19.9 | 121.4 | 60.1 | -426.885 | 0.9702 |
| 69.9  | 67.2 | 58.9 | 29.7 | 130.4 | 71.1 | -428.71  | 0.9702 |
| 59.2  | 64.0 | 63.6 | 39.1 | 128.7 | 55.1 | -424.386 | 0.9701 |
| 64.7  | 73.9 | 60.6 | 25.9 | 127.1 | 76.5 | -430.707 | 0.9701 |
| 96.0  | 79.8 | 52.2 | 42.9 | 150.7 | 53.1 | -424.451 | 0.9701 |

## Supporting References

1. Waterhouse, A. M., J. B. Procter, D. M. A. Martin, M. Clamp, and G. J. Barton. 2009. Jalview Version 2— a multiple sequence alignment editor and analysis workbench. *Bioinformatics* 25:1189-1191.
